# Supplementary material for: Enantioselective aza-Morita–Baylis–Hillman reaction between acrylates and N-Boc isatin ketimines: asymmetric construction of chiral 3-substituted-3-aminooxindoles
Source: Royal Society of Chemistry journal article supplement (doi:10.1039/c4ob01358a), 2014-08-15
Supplement: c4ob01358a1.pdf [file c4ob01358a1.pdf]

# Supporting Information

## Enantioselective *aza*-Morita-Baylis-Hillman reaction between acrylates and *N*-Boc isatin ketimines: asymmetric construction of chiral 3-substituted-3-aminooxindoles

Xuan Zhao, Tian-Ze Li, Jing-Ying Qian, Feng Sha\*, and Xin-Yan Wu\*

*Key Laboratory for Advanced Materials and Institute of Fine Chemicals, East China University of Science and Technology, 130 Meilong Road, Shanghai 200237, P. R. China*

[xinyanwu@ecust.edu.cn](mailto:xinyanwu@ecust.edu.cn)

### Table of Contents

|                                                                                                    |     |
|----------------------------------------------------------------------------------------------------|-----|
| <b>1. General Information</b> .....                                                                | S2  |
| <b>2. General Procedure for the Preparation of Chiral Catalysts 4d, 4e and <i>ent</i>-4e</b> ..... | S2  |
| <b>3. Copies of NMR Spectra of Chiral Catalysts 4d, 4e and <i>ent</i>-4e</b> .....                 | S4  |
| <b>4. Copies of NMR Spectra of Products 8a-s</b> .....                                             | S7  |
| <b>5. Copies of HPLC Spectra of Products 8a-s</b> .....                                            | S26 |

## 1. General Information

Melting points were taken without correction.  $^1\text{H}$ ,  $^{13}\text{C}$  and  $^{31}\text{P}$  NMR spectra were recorded on Bruker 400 spectrometer.  $^1\text{H}$  NMR and  $^{13}\text{C}$  NMR spectra were referenced to tetramethylsilane ( $\delta$  0.00) using  $d_6$ -DMSO as solvent. The chemical shifts of  $^{31}\text{P}$  NMR spectra were referenced to 85%  $\text{H}_3\text{PO}_4$  (0.0 ppm). IR spectra were recorded on Nicolet Magna-I 550 spectrometer. High Resolution Mass spectra (HRMS) were recorded on Micromass GCT with Electron Spray Ionization (ESI) resource. Dichloromethane was distilled from  $\text{CaH}_2$ . Thin-layer chromatography (TLC) was performed on Silicycle 10-40  $\mu\text{m}$  silica gel plates. Column chromatography was performed using silica gel (300-400 mesh) eluting with ethyl acetate and petroleum ether.

## 2. General Procedure for the Preparation of Chiral Catalysts **4d**, **4e** and *ent-4e*<sup>1</sup>

To a solution of chiral squaramide<sup>2</sup> (0.35 mmol) in  $\text{CH}_2\text{Cl}_2$  (5 mL) was added the corresponding 2-amino-1-(diphenylphosphino)-cyclohexane (80 mg, 0.28 mmol) in  $\text{CH}_2\text{Cl}_2$  (5 mL). After stirring at room temperature for 5 days, the reaction mixture was filtered, and the precipitate was washed with  $\text{CH}_2\text{Cl}_2$  (3 $\times$ 5 mL) to afford phosphine-squaramide as solid.

### 2.1 3-((1*R*,2*R*)-2-(diphenylphosphino)cyclohexylamino)-4-((*R*)-1-phenylethylamino)cyclobut-3-ene-1,2-dione (**4d**)

White solid, 45% yield, Mp > 300 °C;  $[\alpha]_D^{26}$  -10.4 ( $c$  0.13, DMSO);  $^1\text{H}$  NMR (DMSO- $d_6$ , 400 MHz): 7.47-7.20 (m, 17H), 5.10-5.08 (m, 1H), 3.81-3.79 (m, 1H), 2.61-2.56 (m, 1H), 1.94-1.92 (m, 1H), 1.69-1.60 (m, 3H), 1.49-1.48 (m, 4H), 1.27-1.25 (m, 2H), 0.91-0.89 (m, 1H);  $^{13}\text{C}$  NMR data can not be obtained for the poor solubility of **4d** in organic solvent;  $^{31}\text{P}$  (DMSO- $d_6$ , 162 MHz): -8.19; IR (KBr,  $\text{cm}^{-1}$ ):  $\nu$  3159, 3057, 2933, 2852, 1793, 1641, 1562, 1471, 1206, 1136, 1093, 781, 746, 695; HRMS (ESI) calcd for  $\text{C}_{30}\text{H}_{32}\text{N}_2\text{O}_2\text{P}$  ( $[\text{M}+\text{H}]^+$ ): 483.2201, found: 483.2208.

### 2.2 3-((1*R*,2*R*)-2-(diphenylphosphino)cyclohexylamino)-4-((*S*)-1-phenylethylamino)cyclobut-3-ene-1,2-dione (**4e**)

White solid, 42% yield, Mp > 300 °C;  $[\alpha]_D^{25}$  -41.2 ( $c$  0.25, DMSO);  $^1\text{H}$  NMR (DMSO- $d_6$ , 400 MHz): 7.47-7.21 (m, 17H), 5.09-5.09 (m, 1H), 3.80-3.79 (m, 1H), 2.61-2.56 (m, 1H), 1.94-1.91 (m, 1H), 1.69-1.60 (m, 3H), 1.49-1.48 (m, 4H), 1.27-1.24 (m, 2H), 0.91-0.86 (m, 1H);  $^{13}\text{C}$  NMR data can not be obtained for the poor solubility of **4e** in organic solvent;  $^{31}\text{P}$  (DMSO- $d_6$ , 162 MHz): -8.24; IR (KBr,  $\text{cm}^{-1}$ ):  $\nu$  3160, 3053, 2932, 2854, 1795, 1646, 1572, 1473, 1180, 1133, 1091, 778, 743, 697; HRMS (ESI) calcd for  $\text{C}_{30}\text{H}_{32}\text{N}_2\text{O}_2\text{P}$  ( $[\text{M}+\text{H}]^+$ ): 483.2201, found: 483.2204.

<sup>1</sup> J.-Y. Qian, C.-C. Wang, F. Sha and X.-Y. Wu, *RSC Adv.*, 2012, **2**, 6042.

<sup>2</sup> F. Lovering, S. Kirincich, W. Wang, K. Combs, L. Resnick, J. E. Sabalski, J. Butera, J. Liu, K. Parris and J. B. Telliez, *Bioorg. Med. Chem.*, 2009, **17**, 3342.

2.3 3-((1*S*,2*S*)-2-(diphenylphosphino)cyclohexylamino)-4-((*R*)-1-phenylethylamino)cyclobut-3-ene-1,2-dione (*ent*-**4e**)

White solid, 39% yield, Mp > 300 °C;  $[\alpha]_D^{25} +40.8$  (*c* 0.25, DMSO);  $^1\text{H}$  NMR (DMSO-*d*<sub>6</sub>, 400 MHz): 7.47-7.20 (m, 17H), 5.09-5.08 (m, 1H), 3.80-3.79 (m, 1H), 2.61-2.56 (m, 1H), 1.94-1.91 (m, 1H), 1.69-1.60 (m, 3H), 1.49-1.47 (m, 4H), 1.28-1.24 (m, 2H), 0.91-0.85 (m, 1H);  $^{13}\text{C}$  NMR data can not be obtained for the poor solubility of *ent*-**4e** in organic solvent;  $^{31}\text{P}$  (DMSO-*d*<sub>6</sub>, 162 MHz): -8.19; IR (KBr,  $\text{cm}^{-1}$ ):  $\nu$  3166, 3068, 2937, 2854, 1800, 1644, 1563, 1477, 1187, 1143, 1088, 778, 748, 735, 694; HRMS (ESI) calcd for C<sub>30</sub>H<sub>30</sub>N<sub>2</sub>O<sub>2</sub>P ([M-H]<sup>-</sup>): 481.2045, found: 481.2047.

### 3. Copies of NMR Spectra of Chiral Catalysts 4d, 4e and *ent*-4e

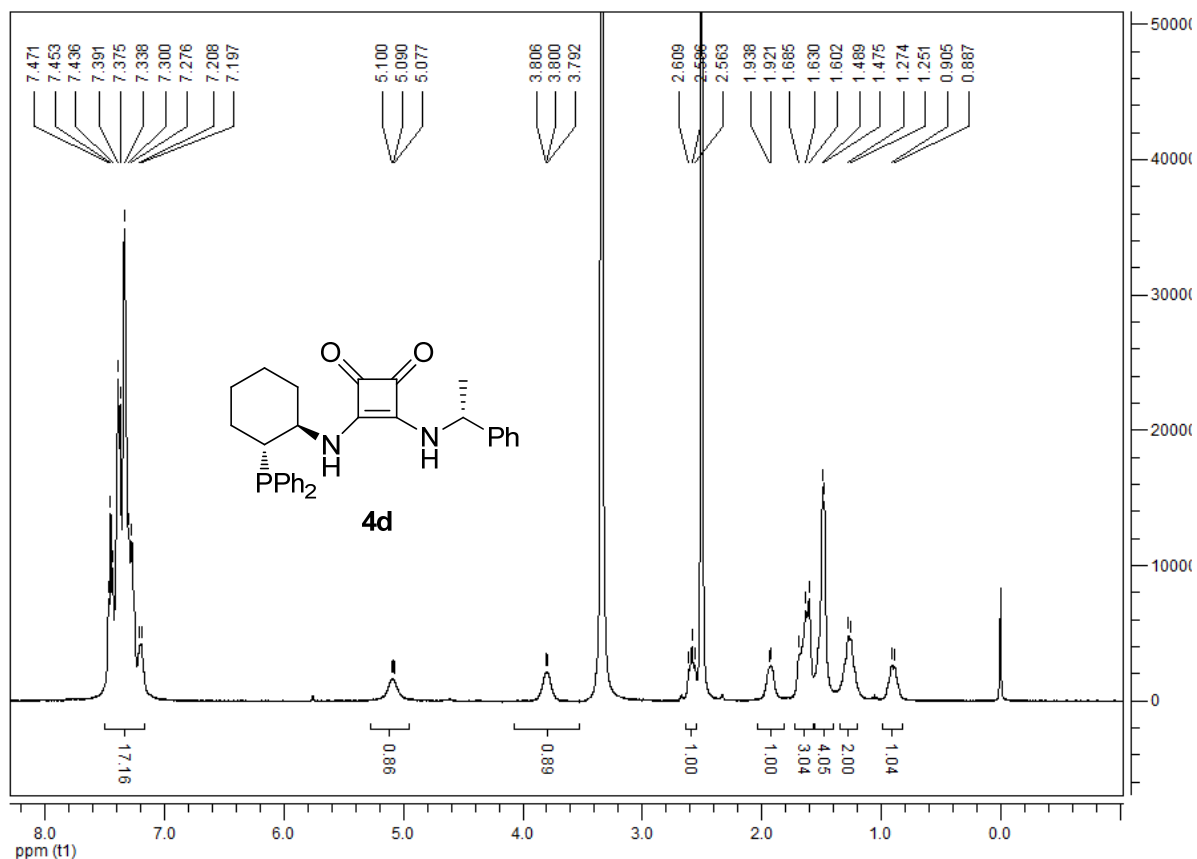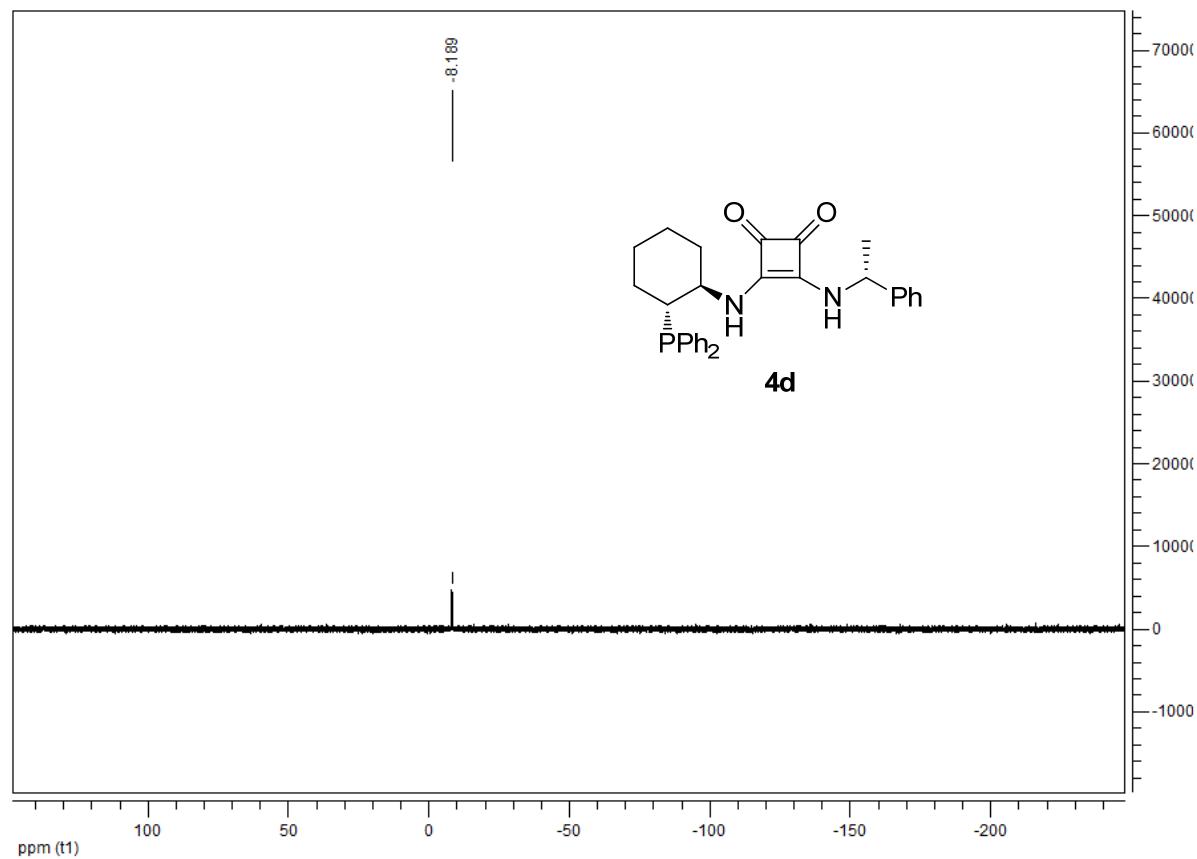

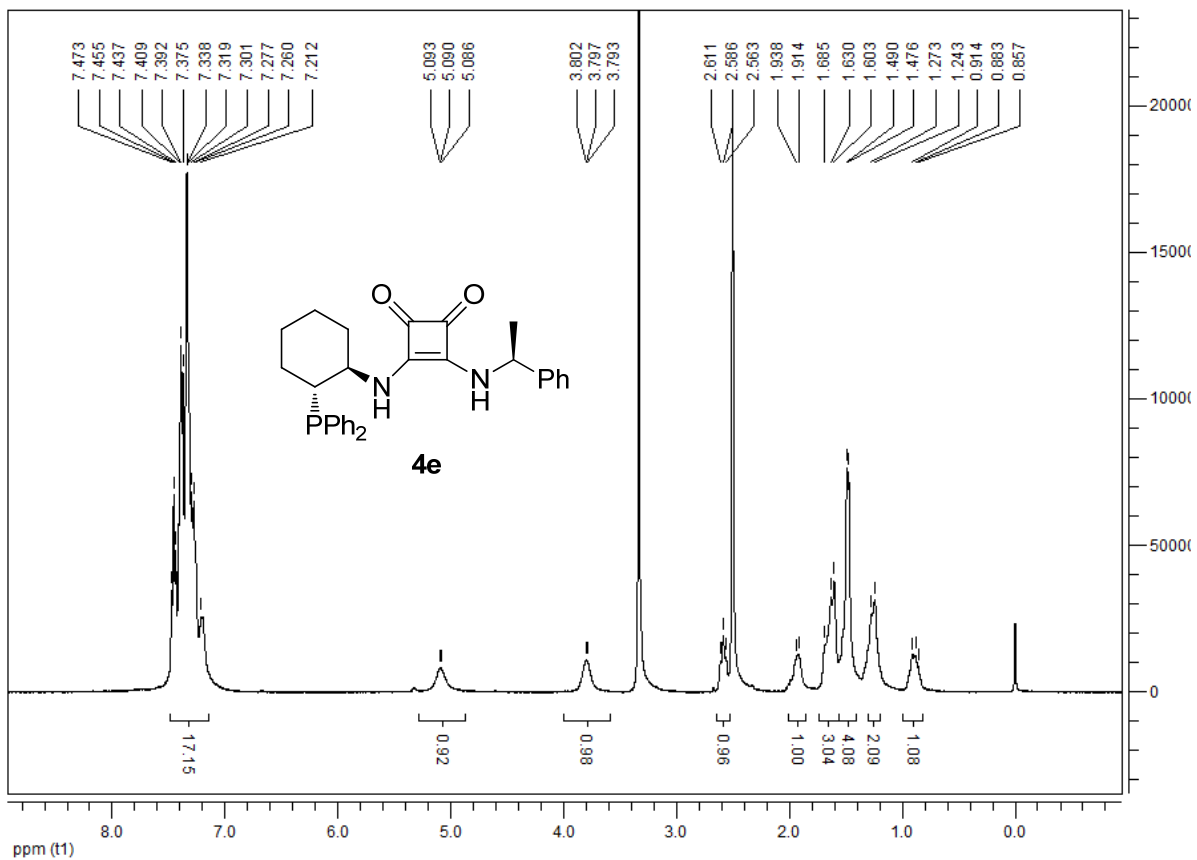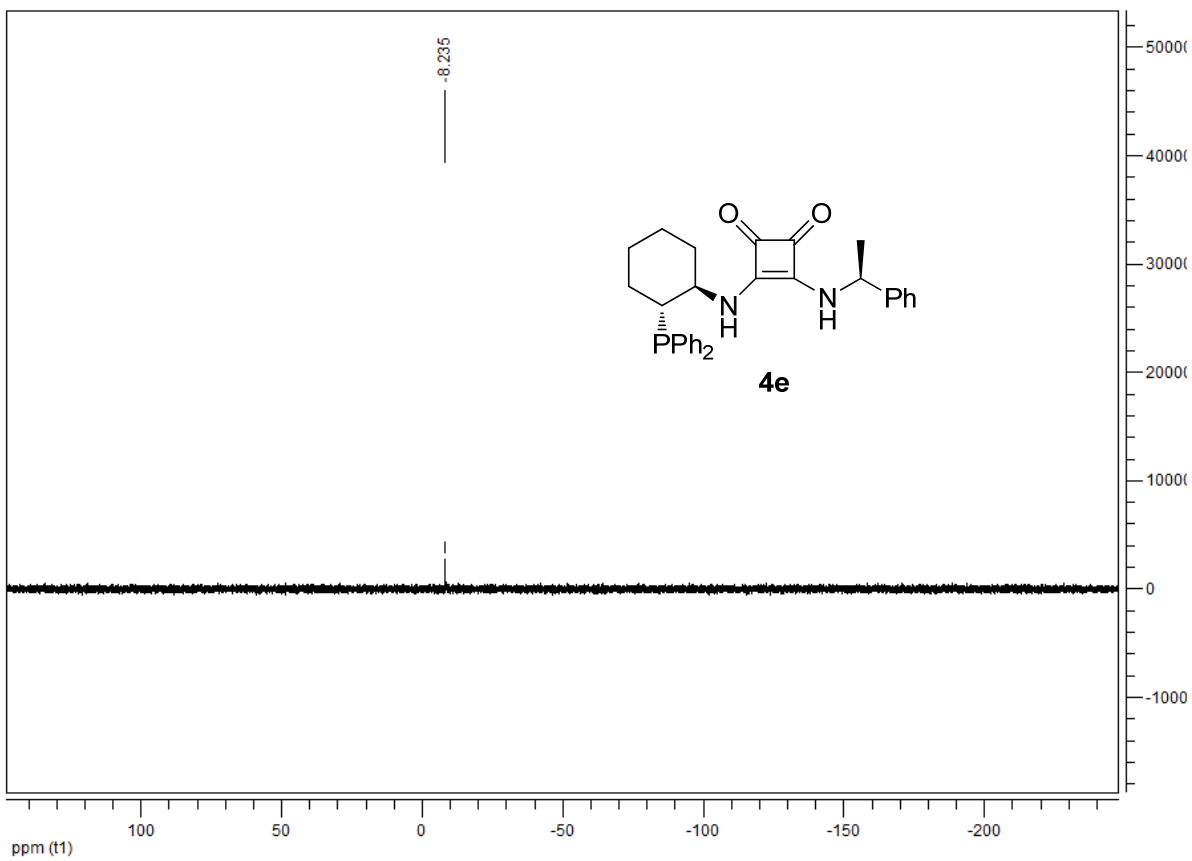

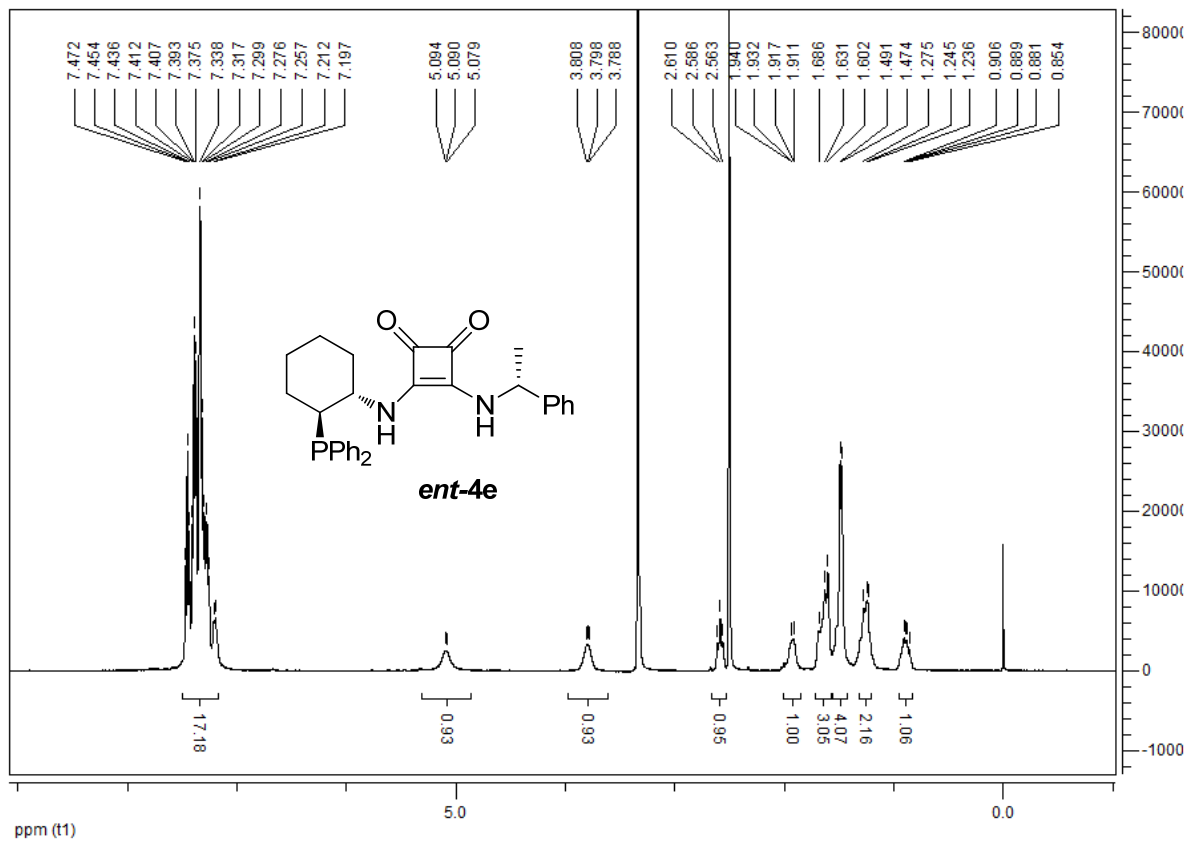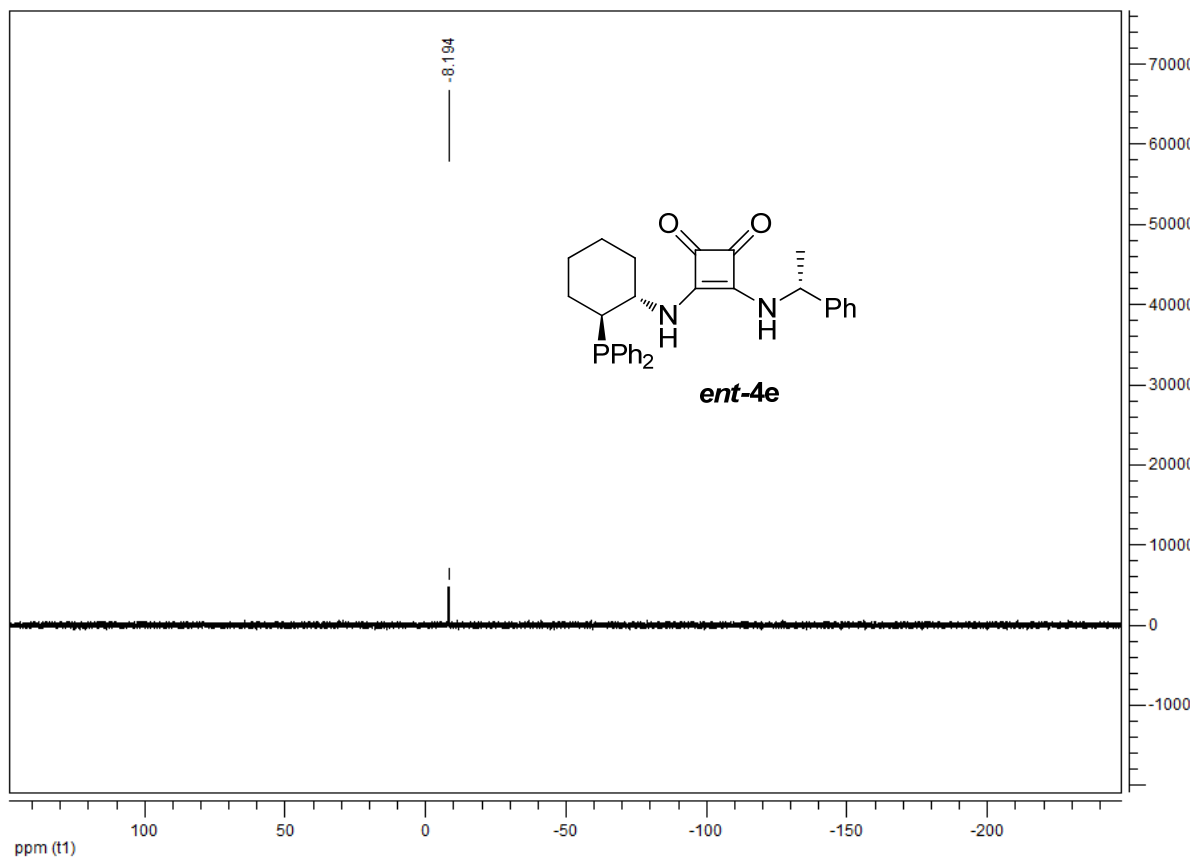

#### 4. Copies of NMR Spectra of Products 8a-s

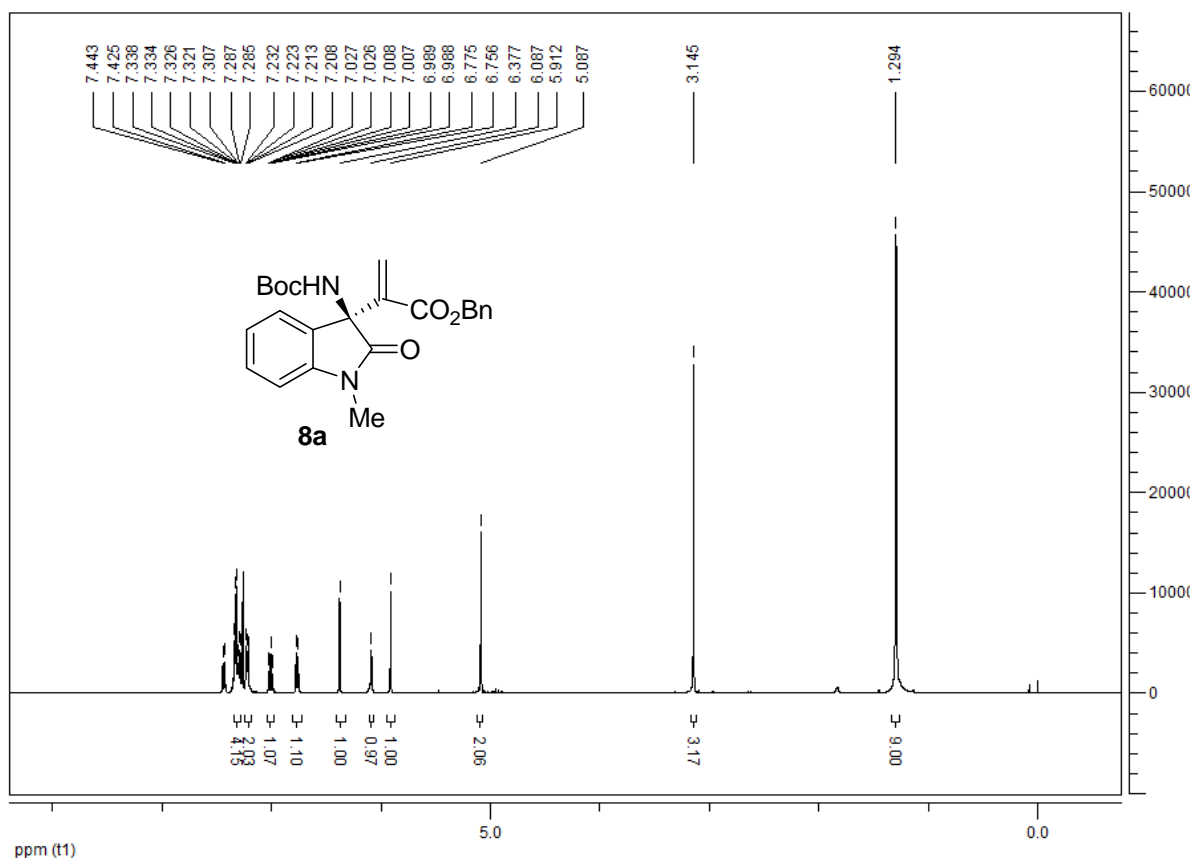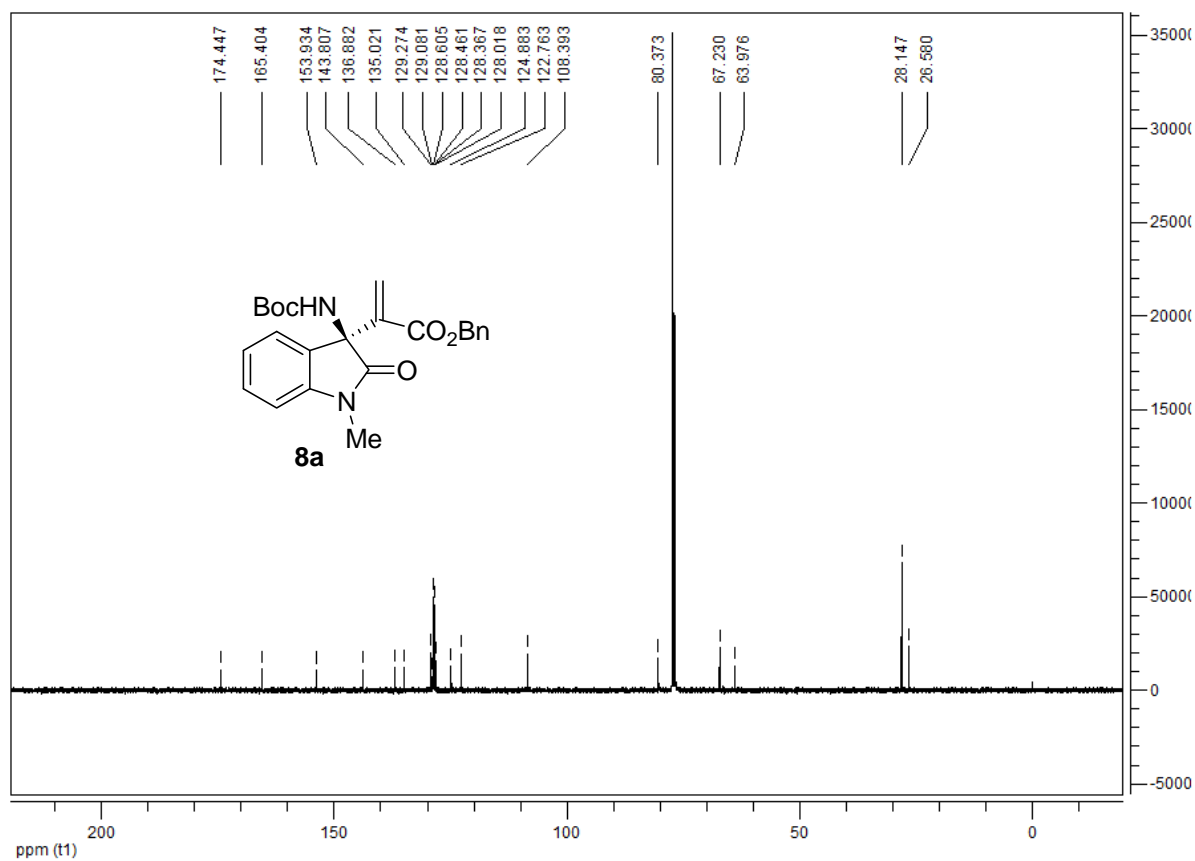

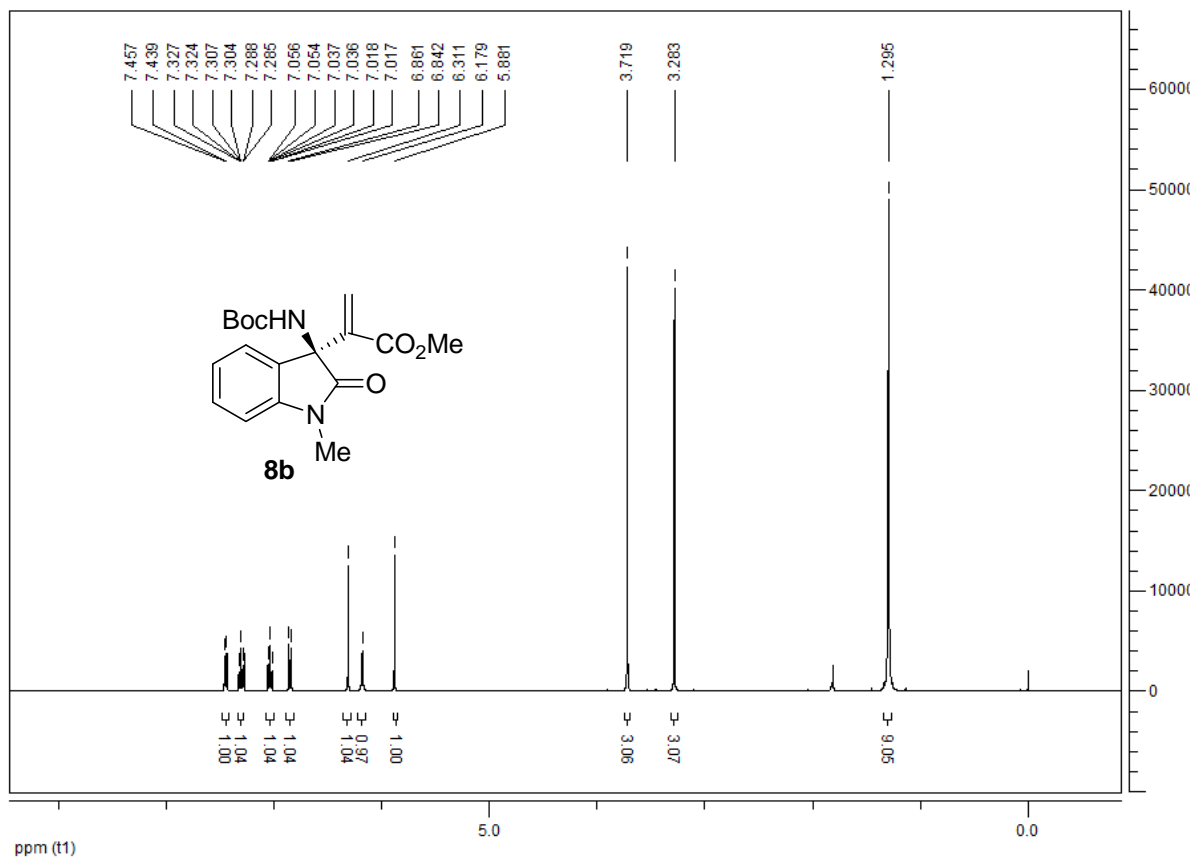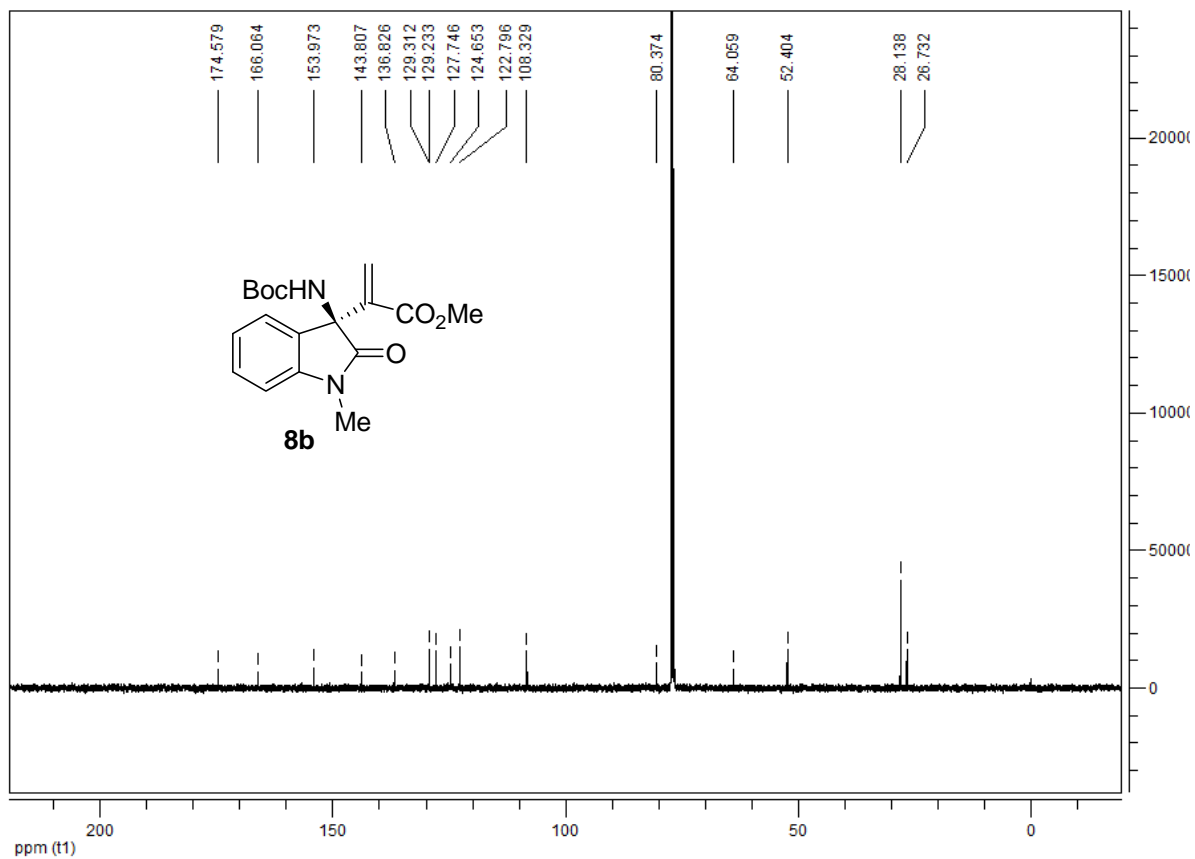



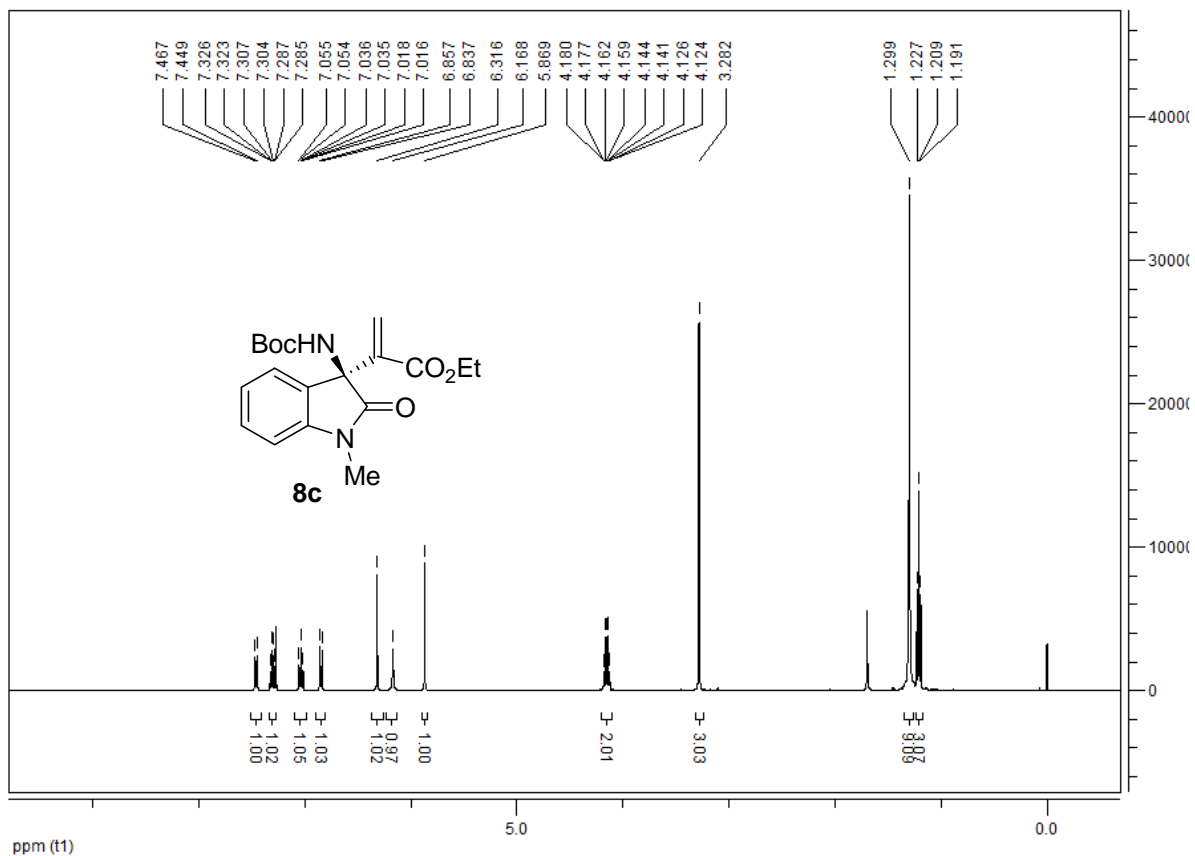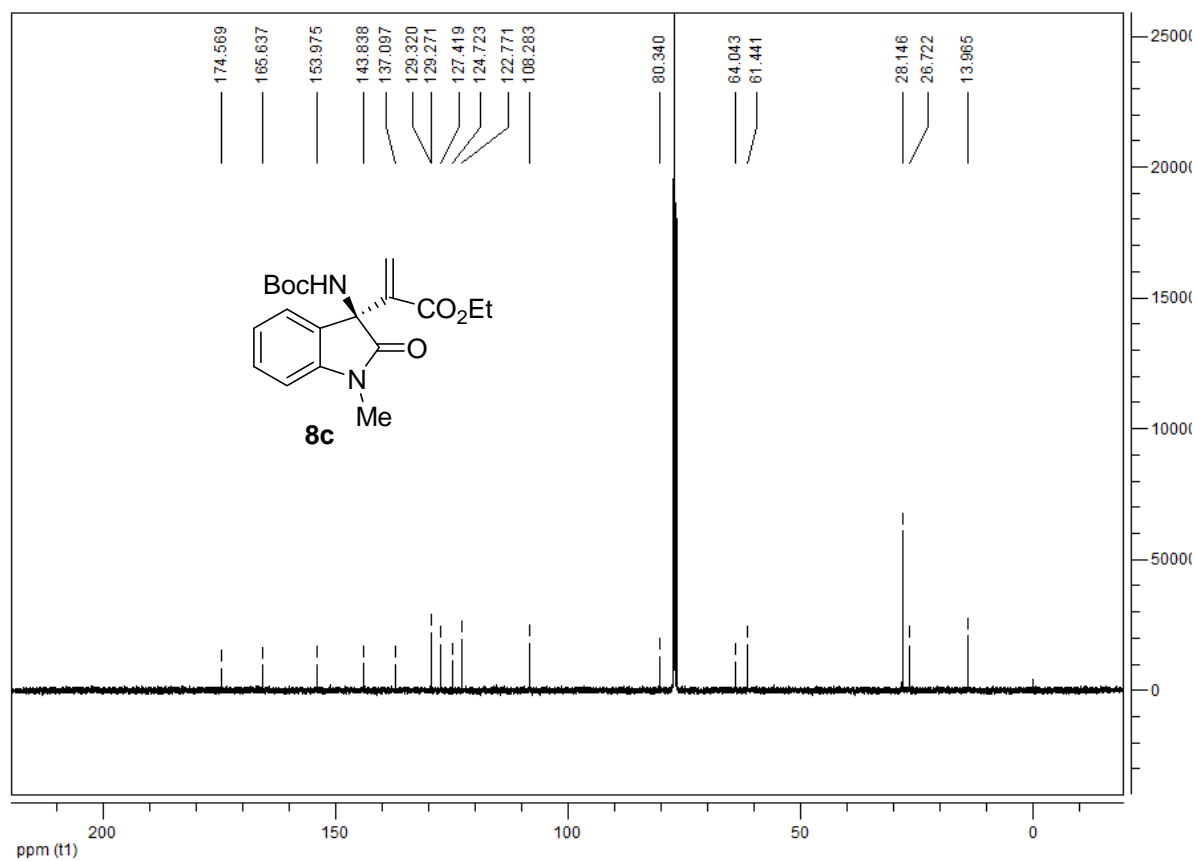

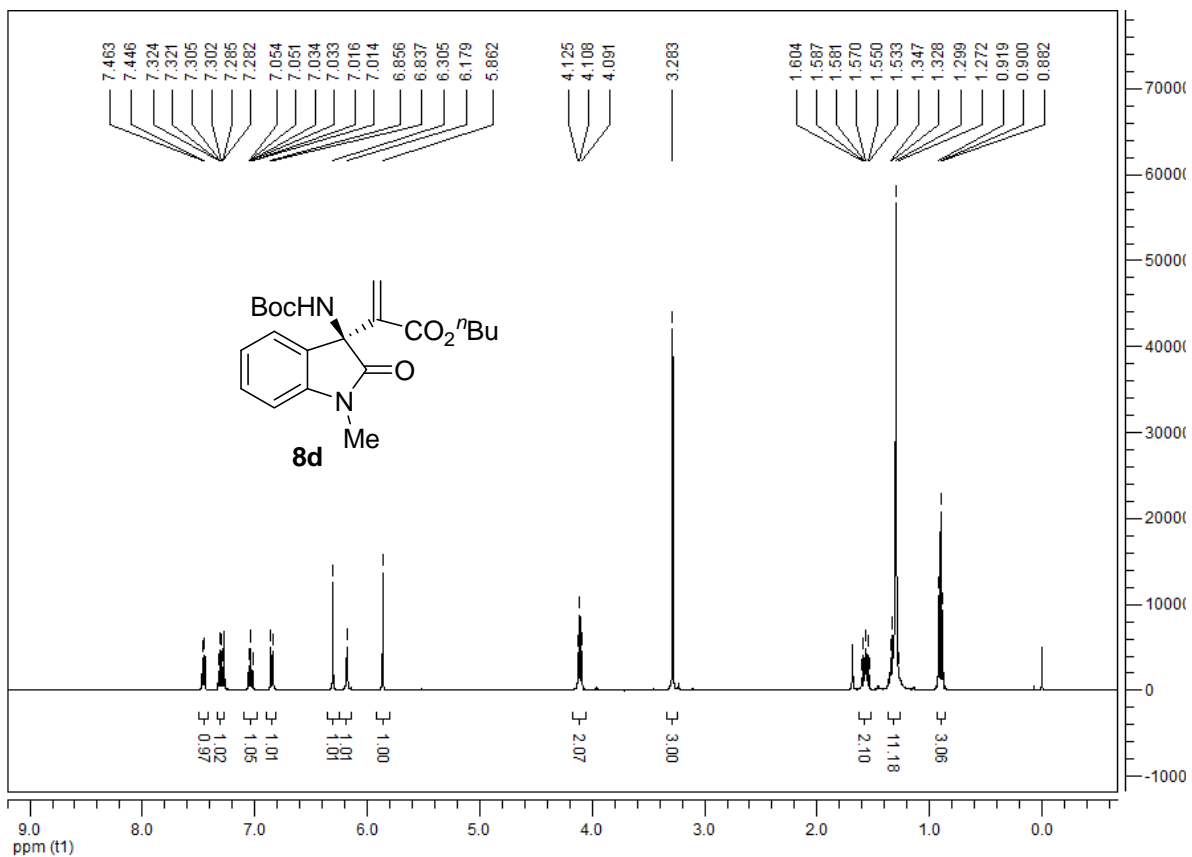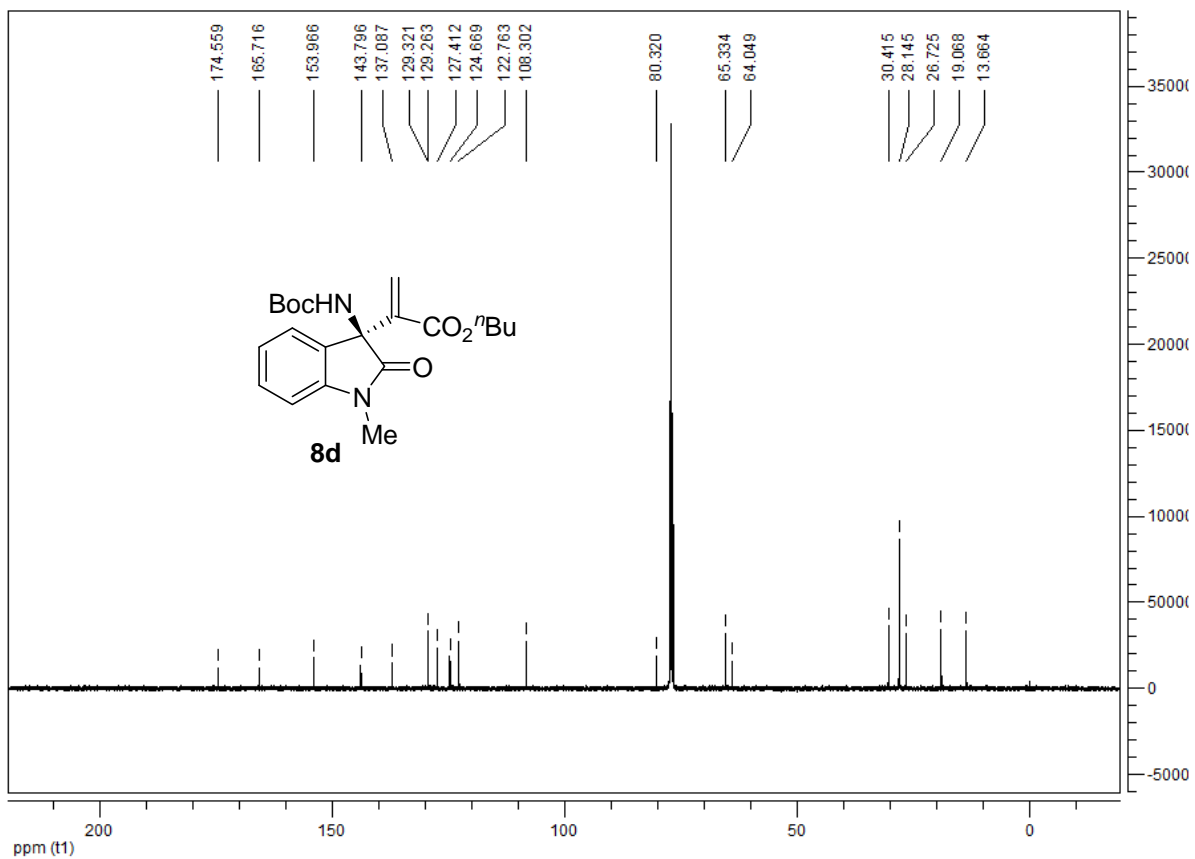

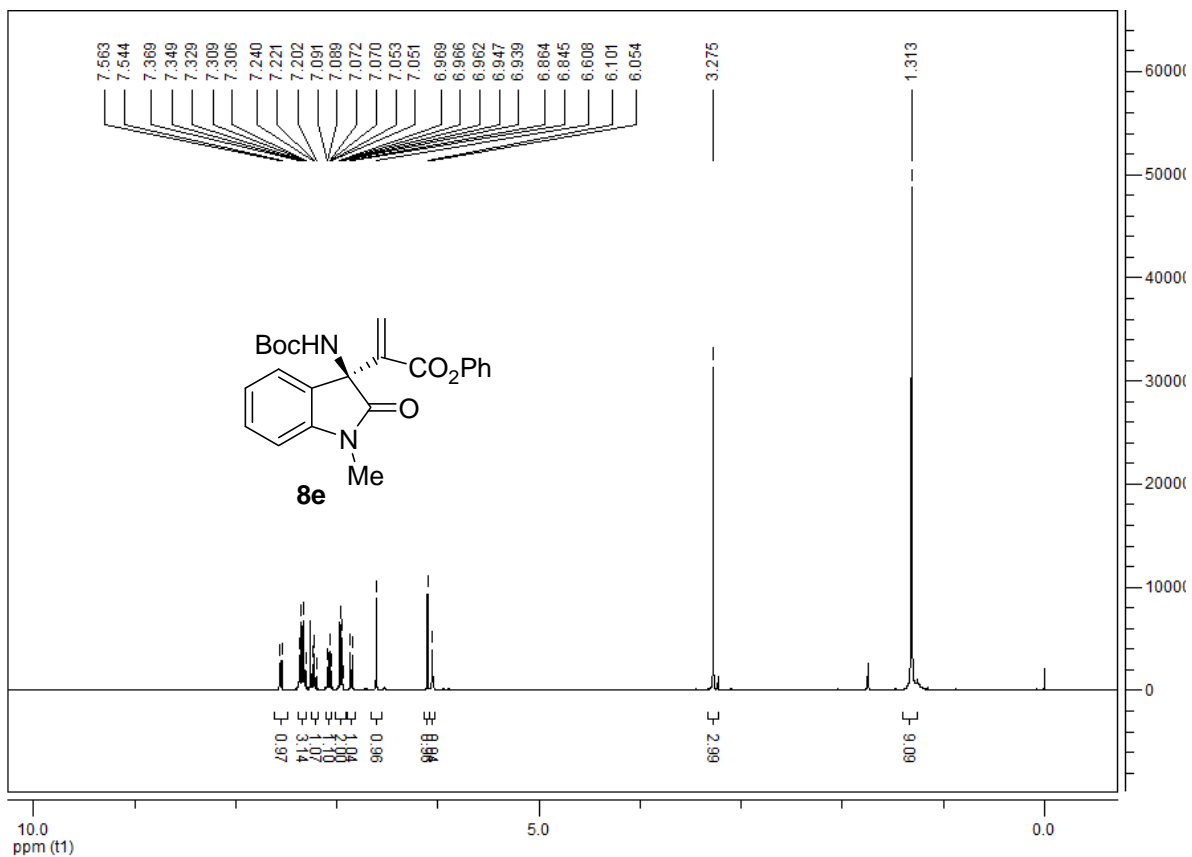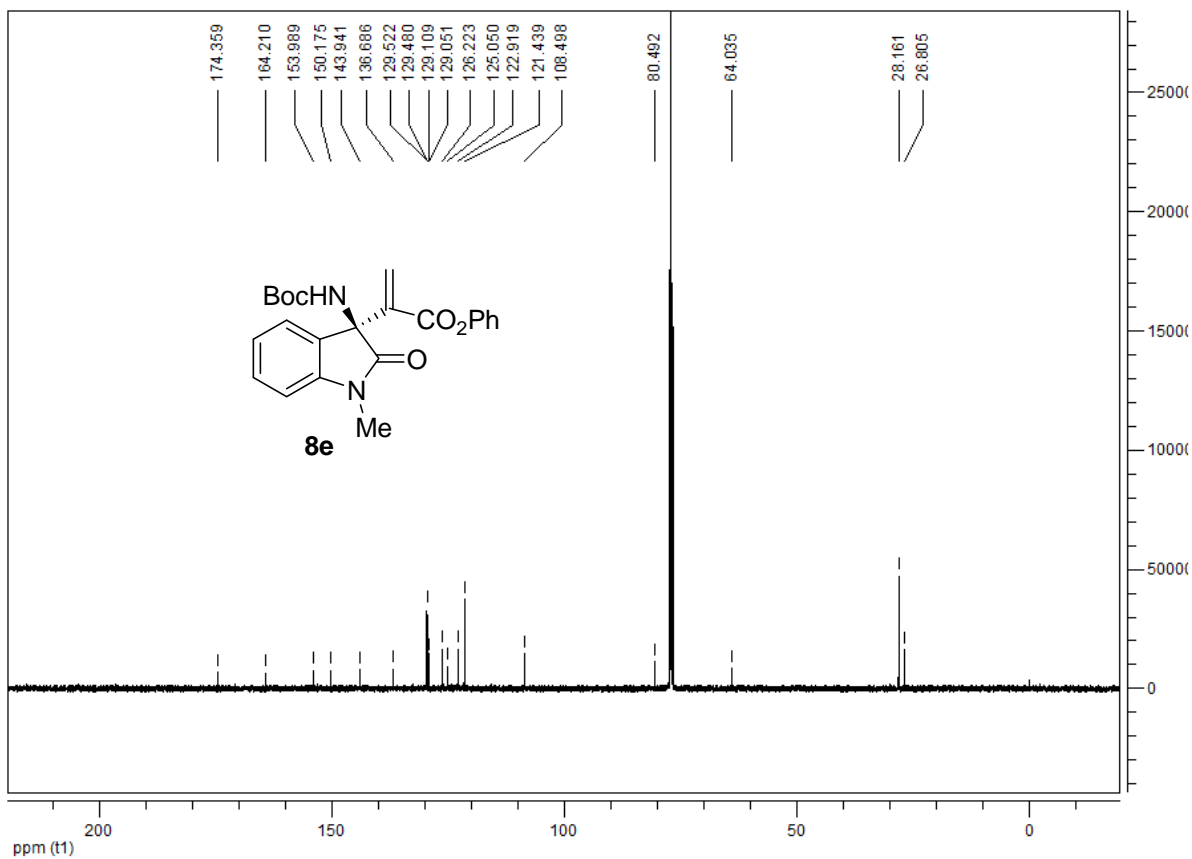

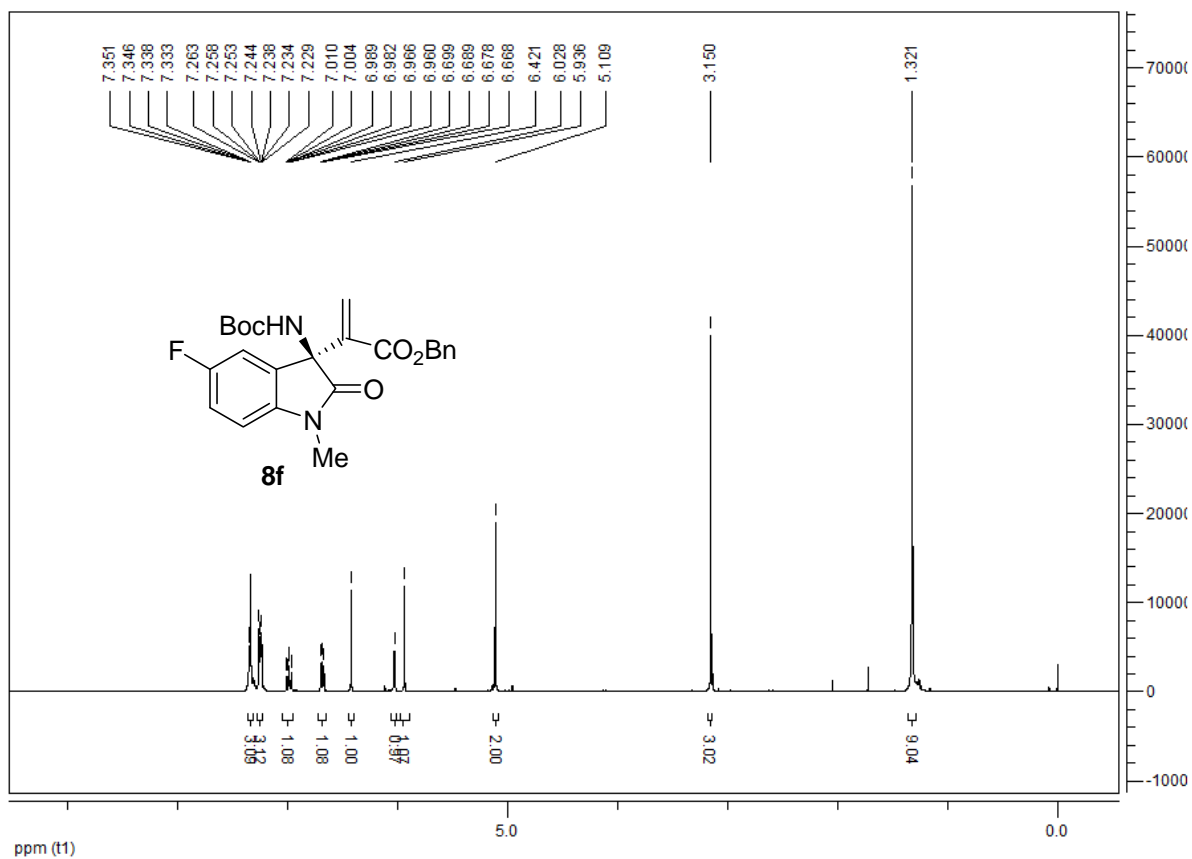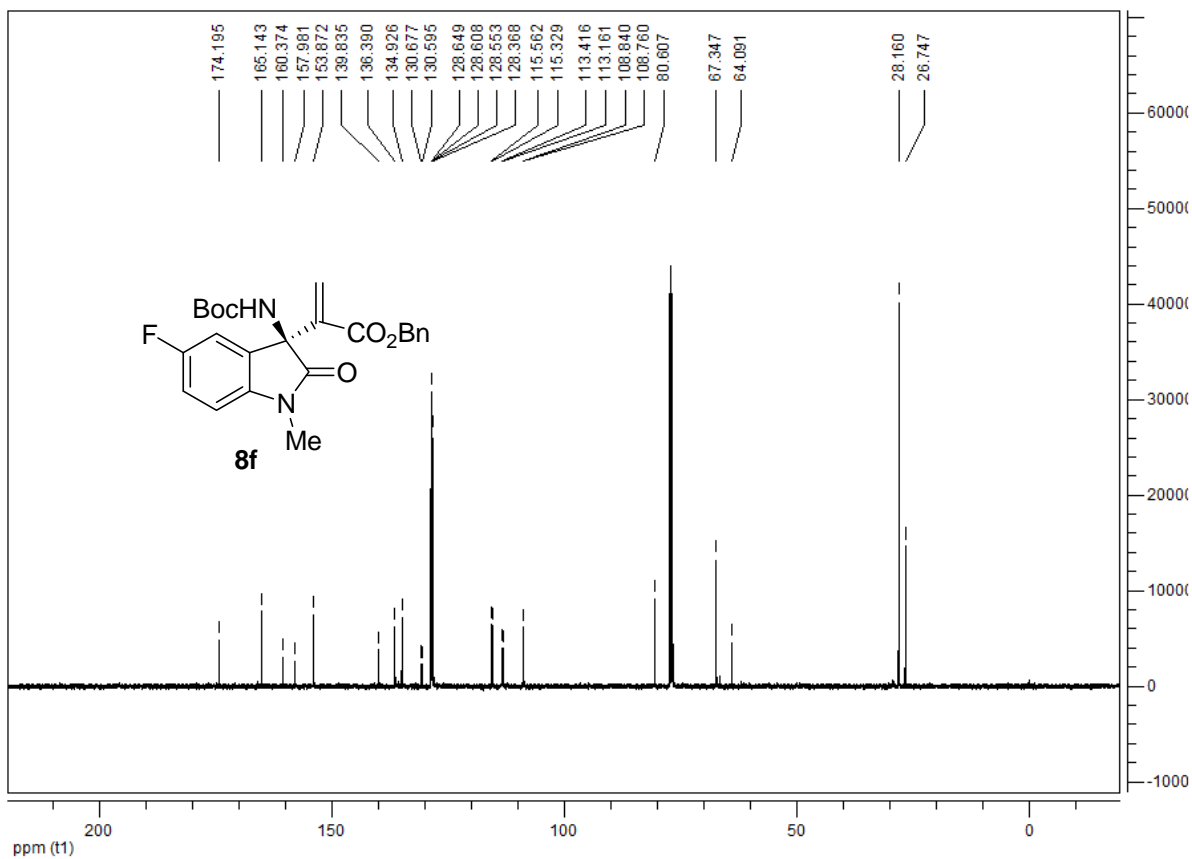

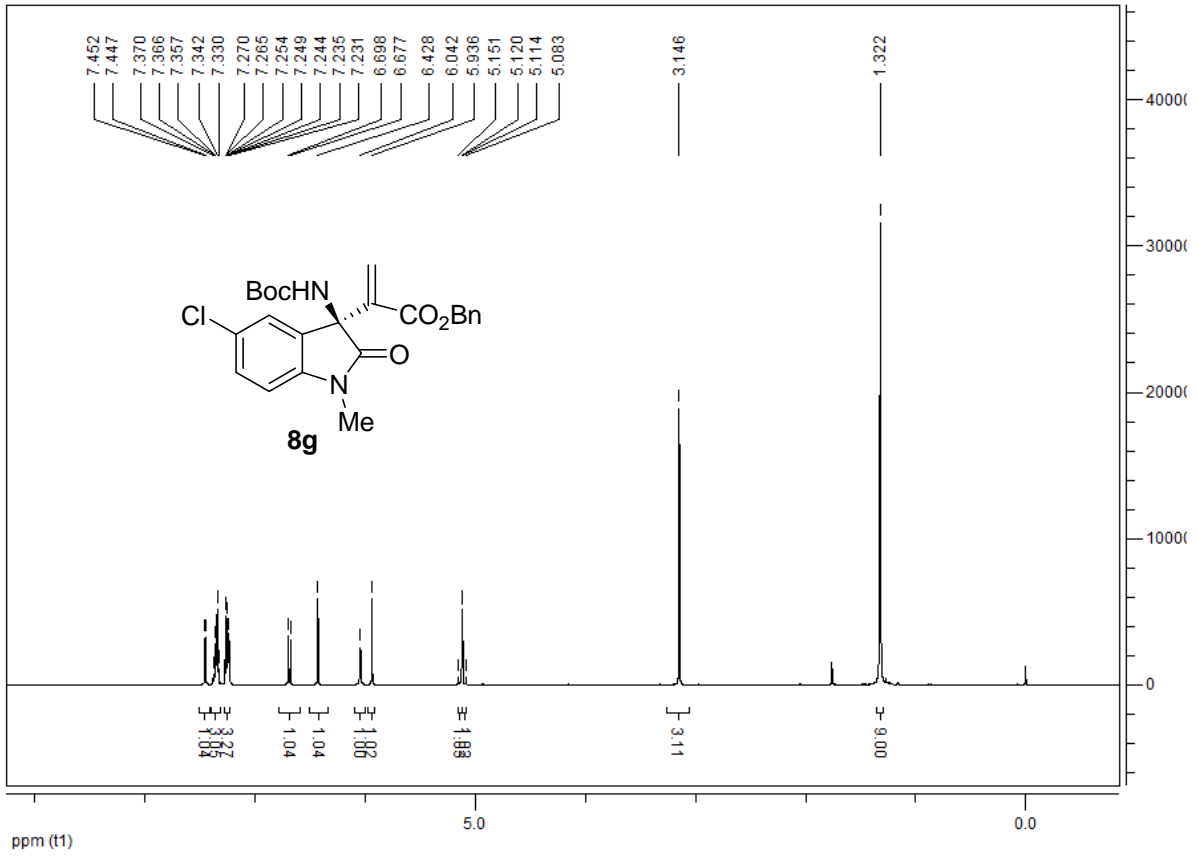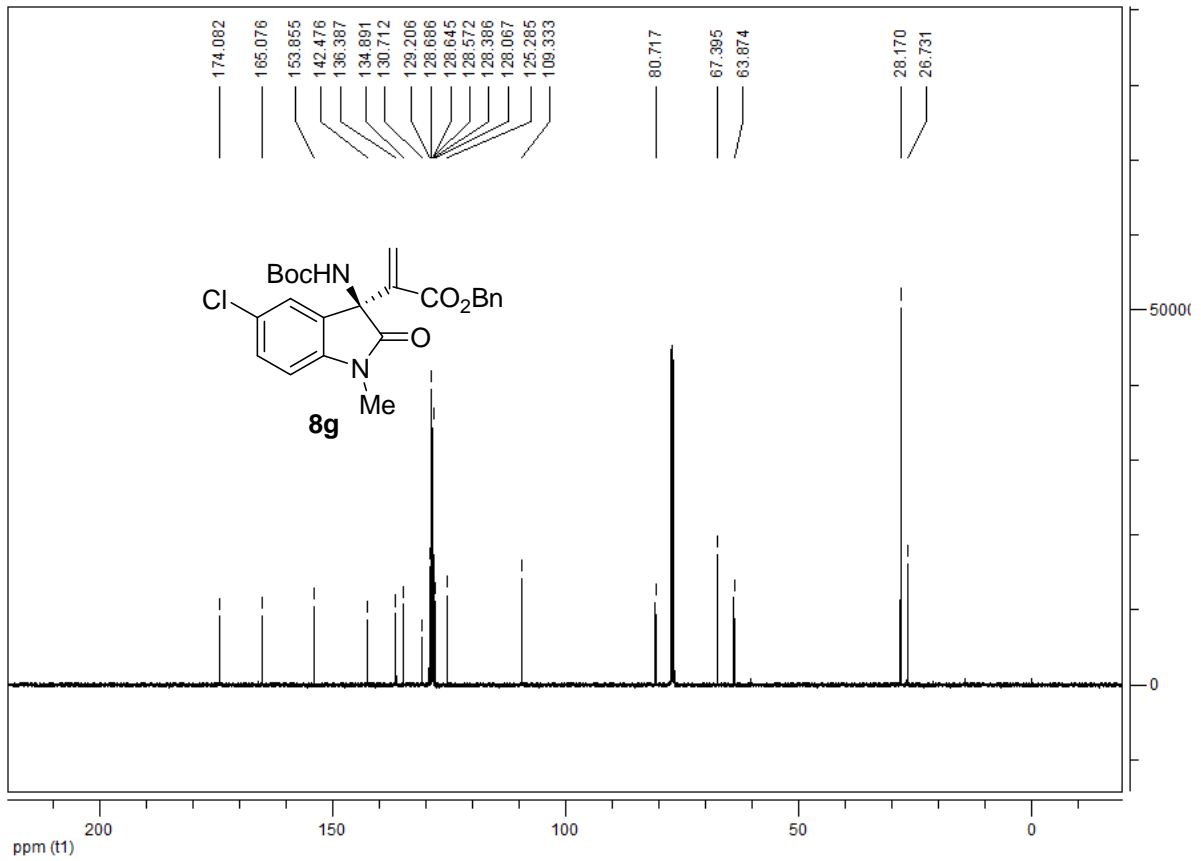

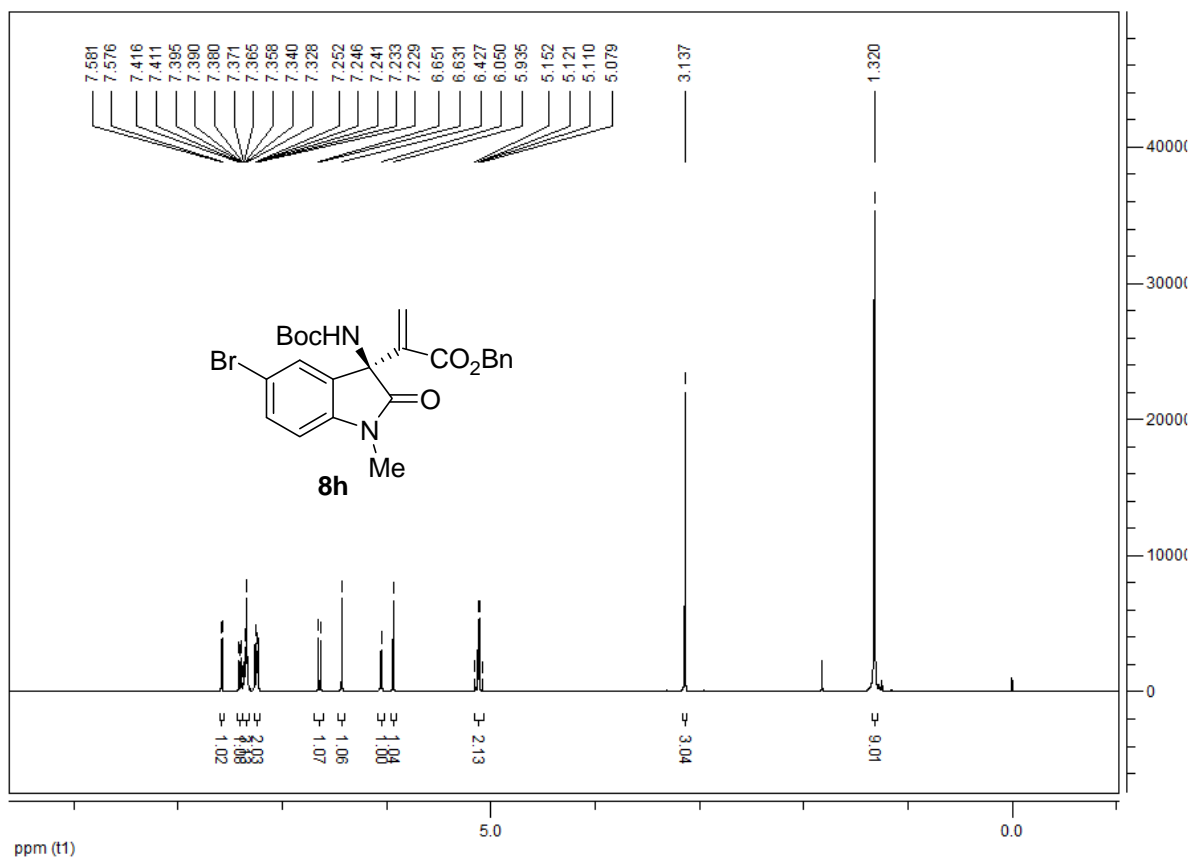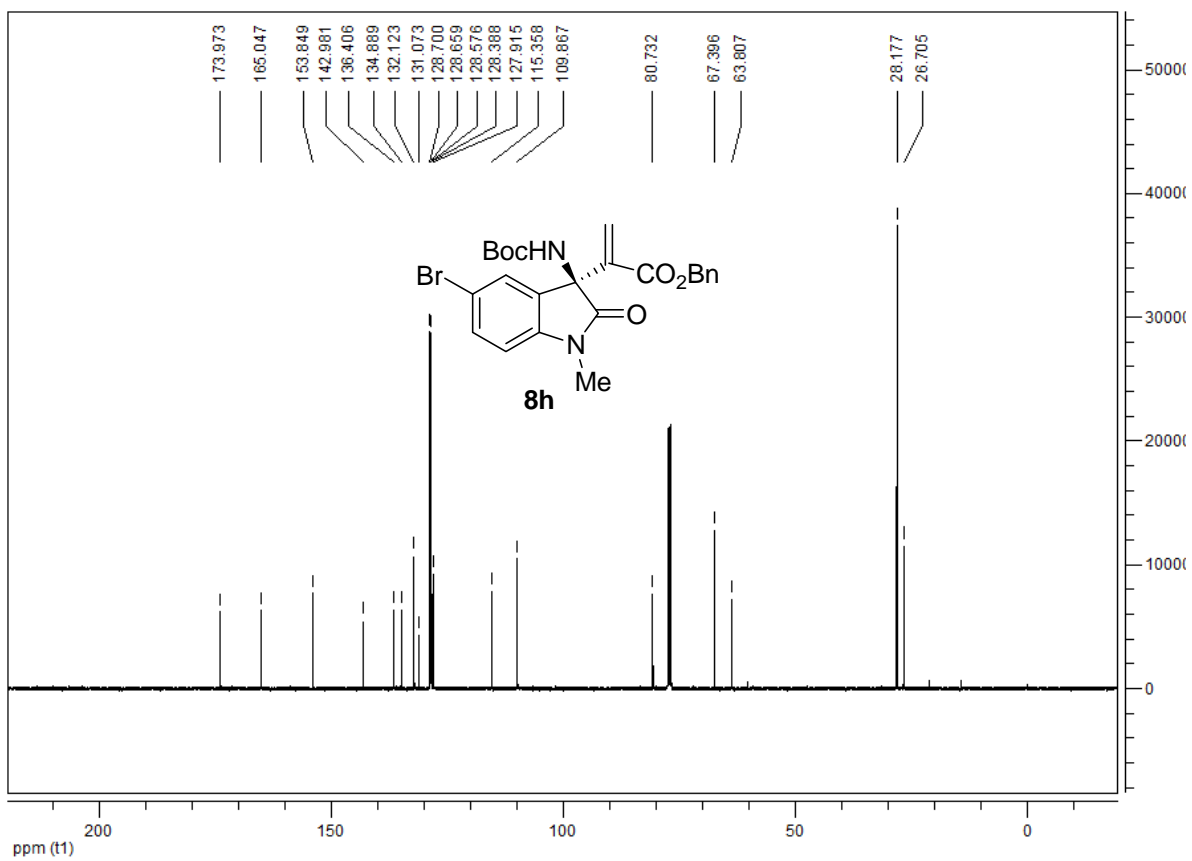

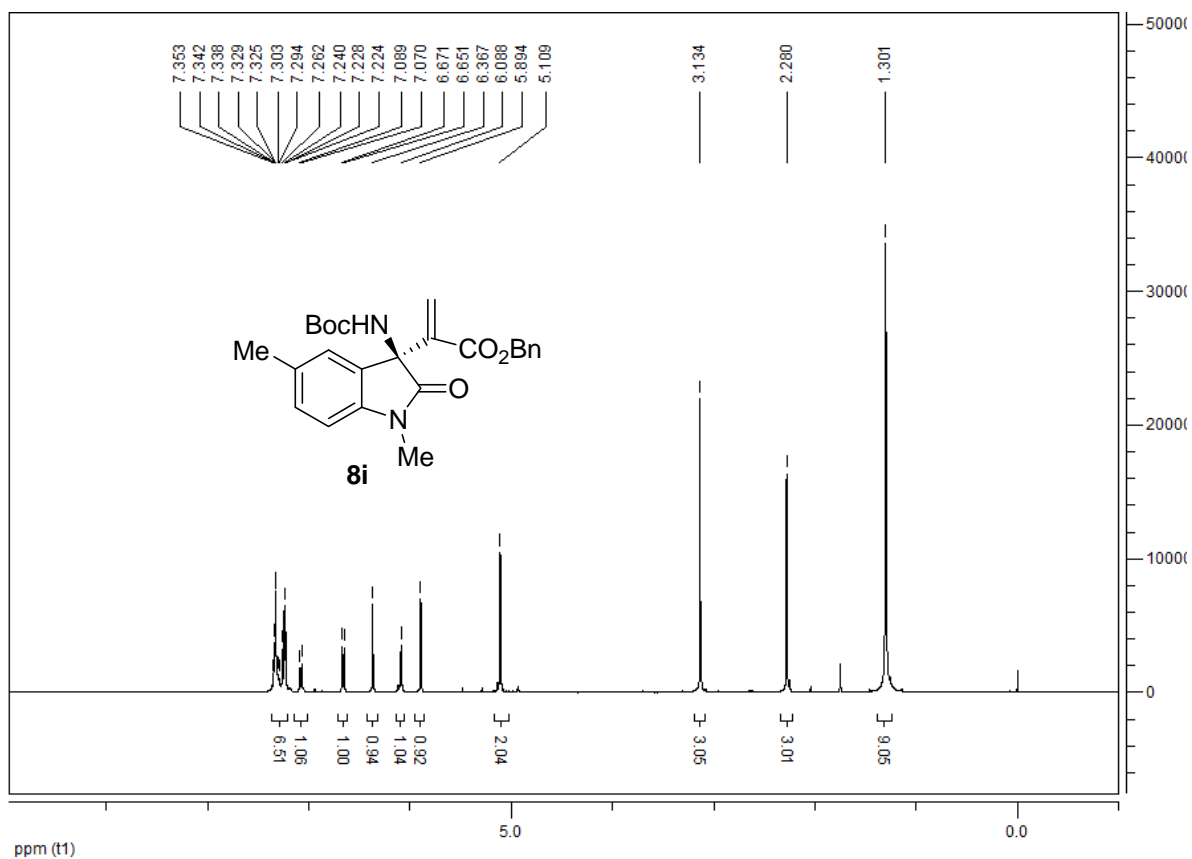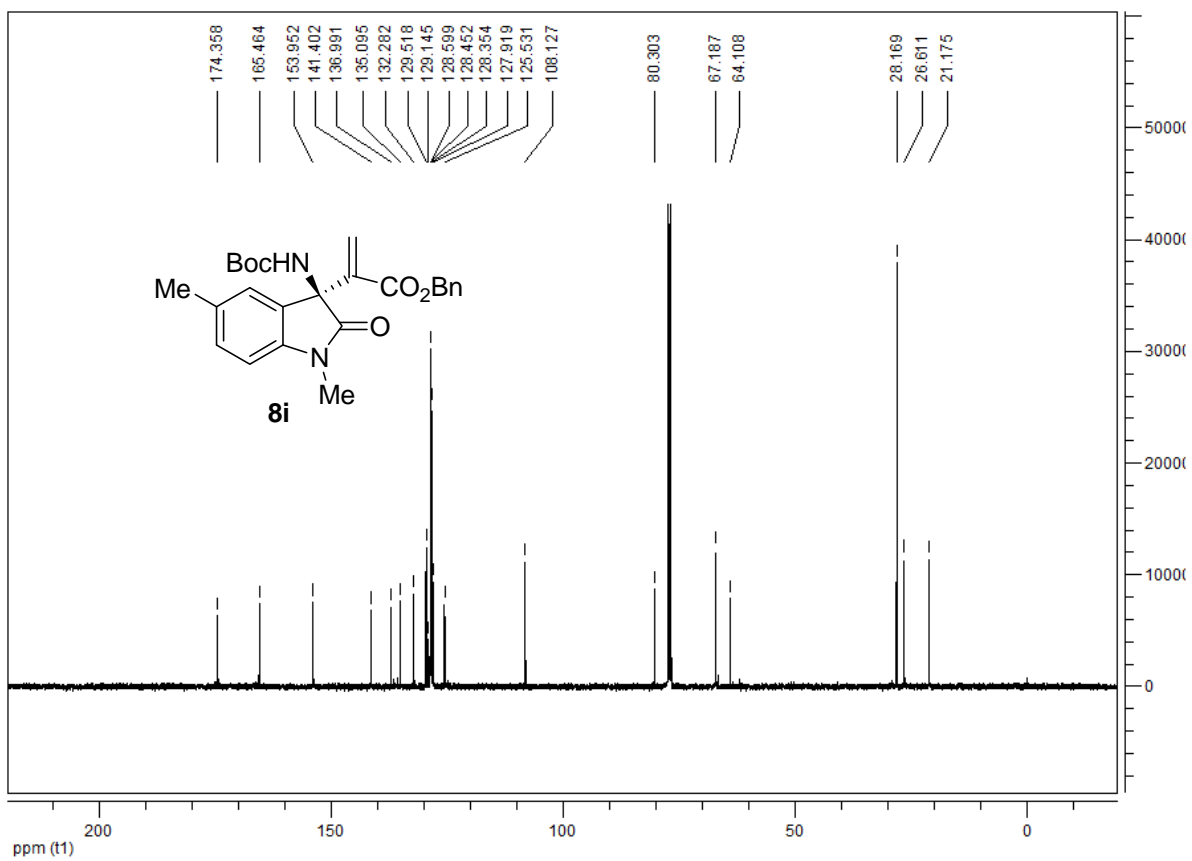

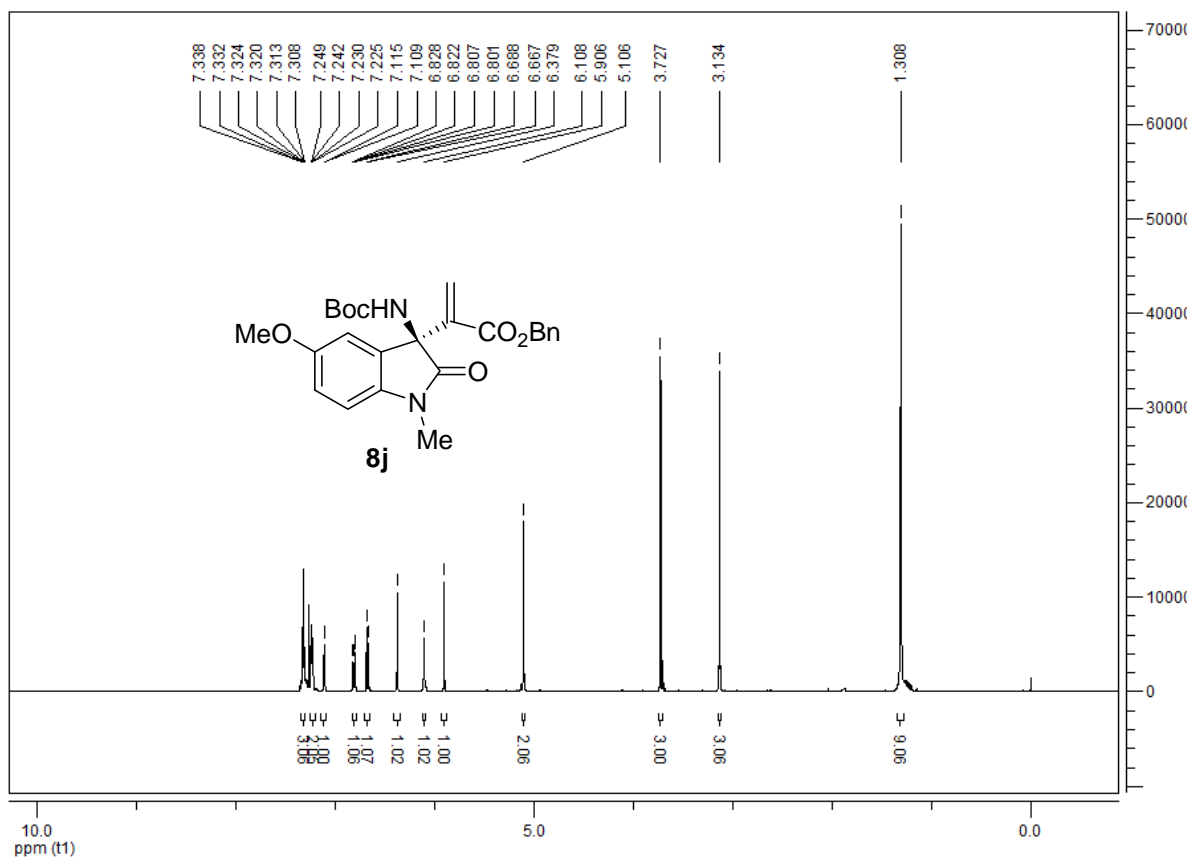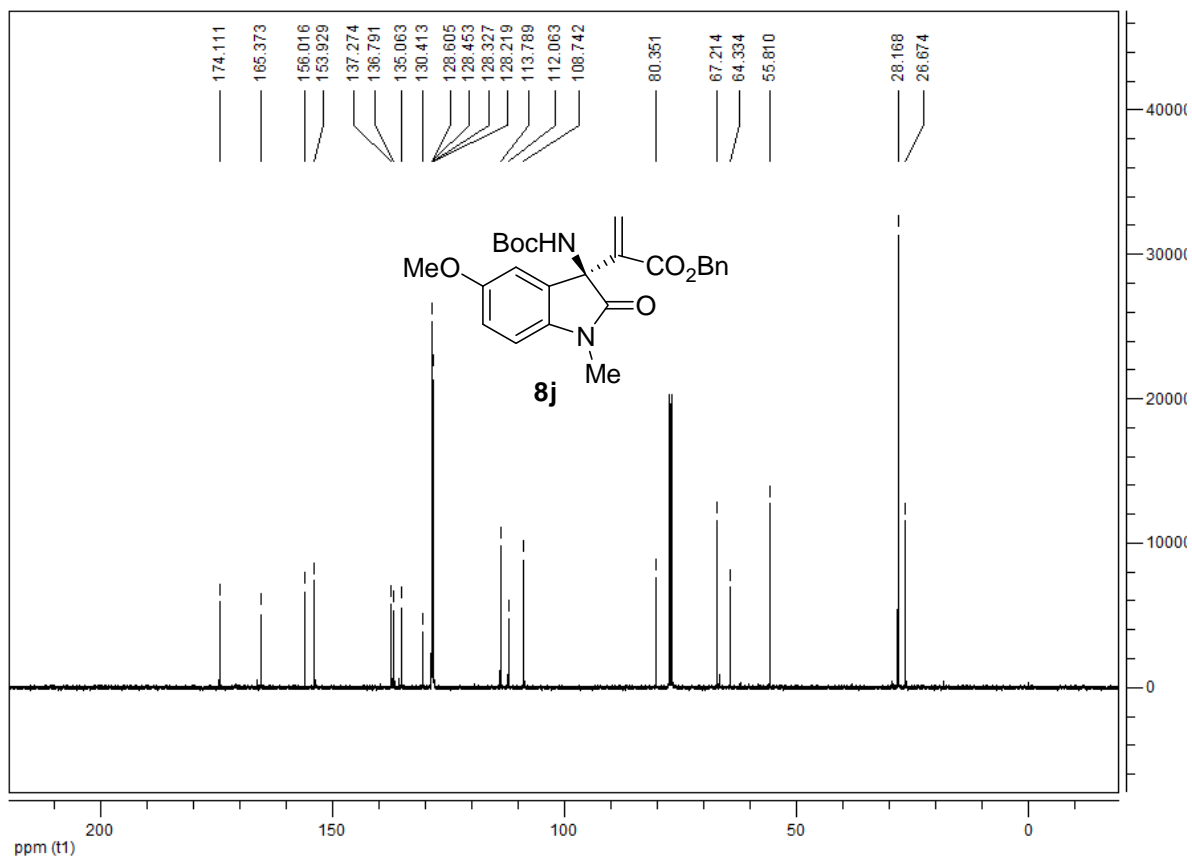



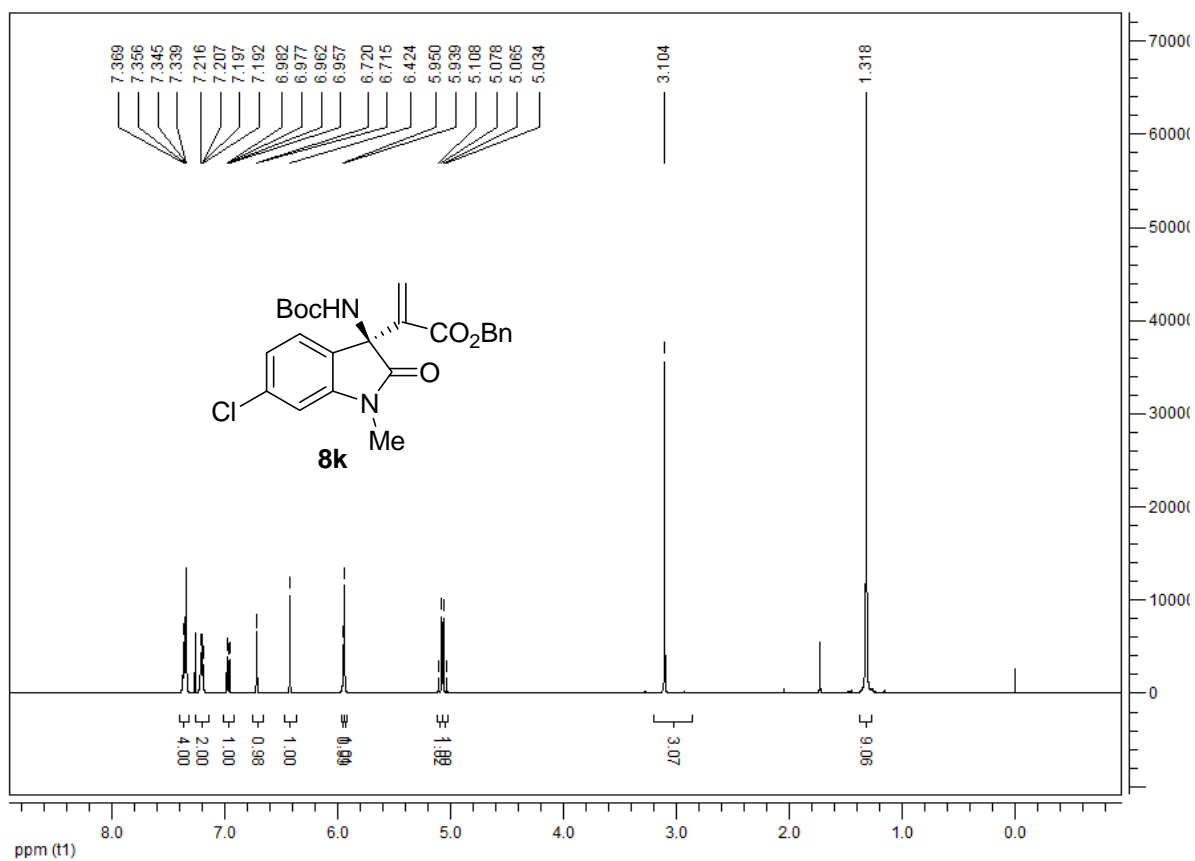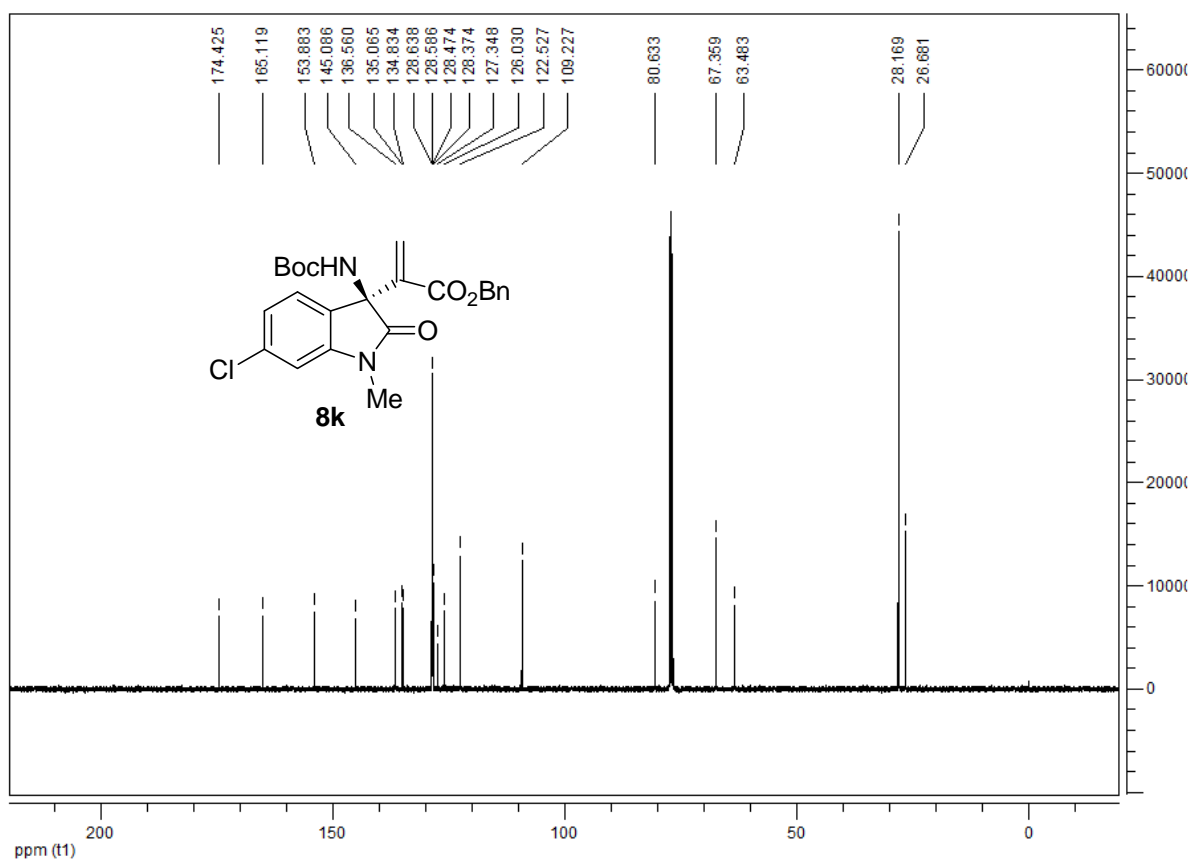

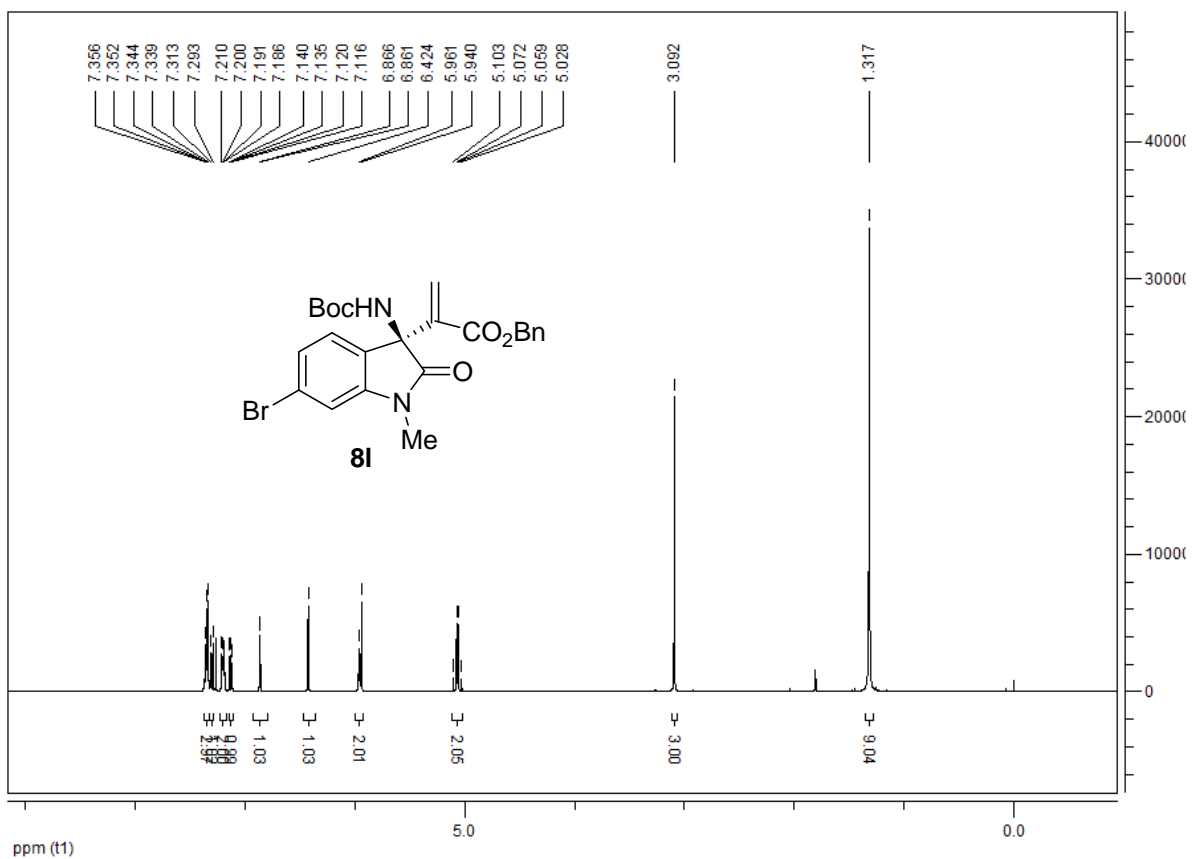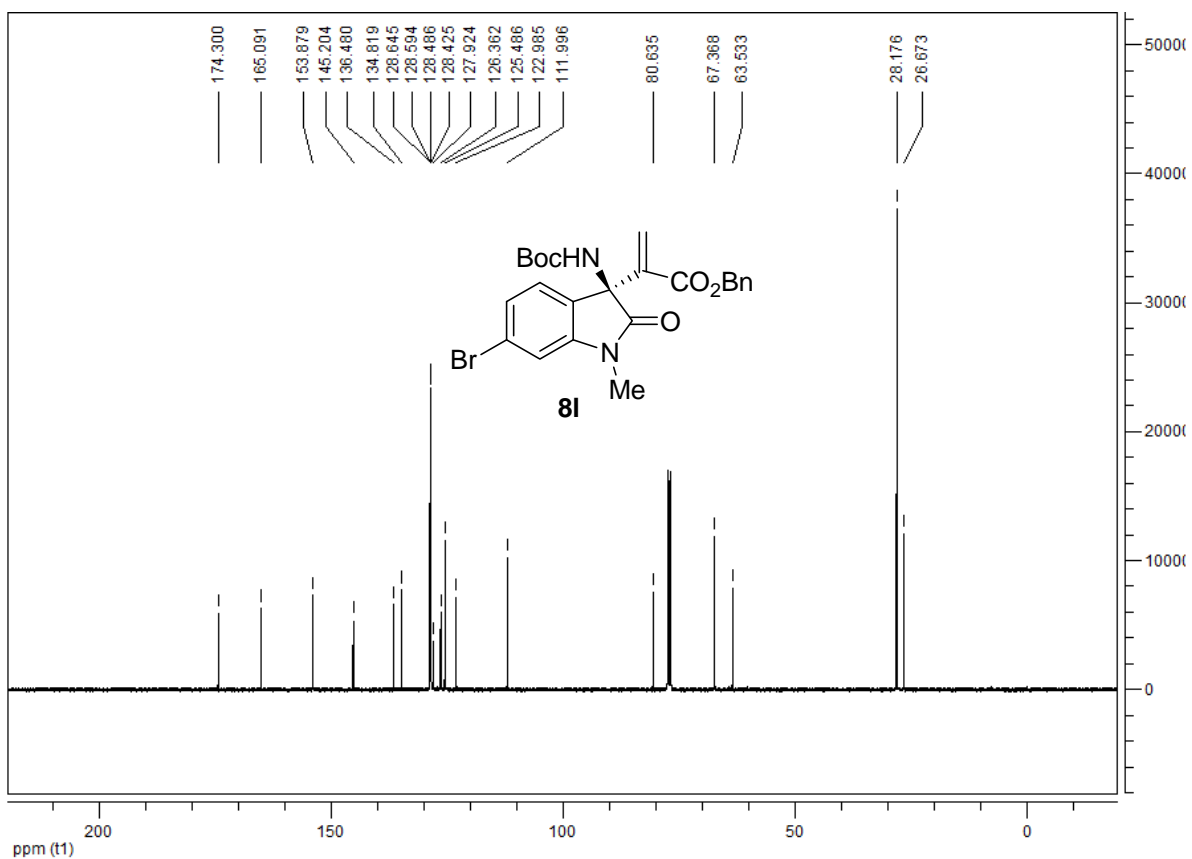

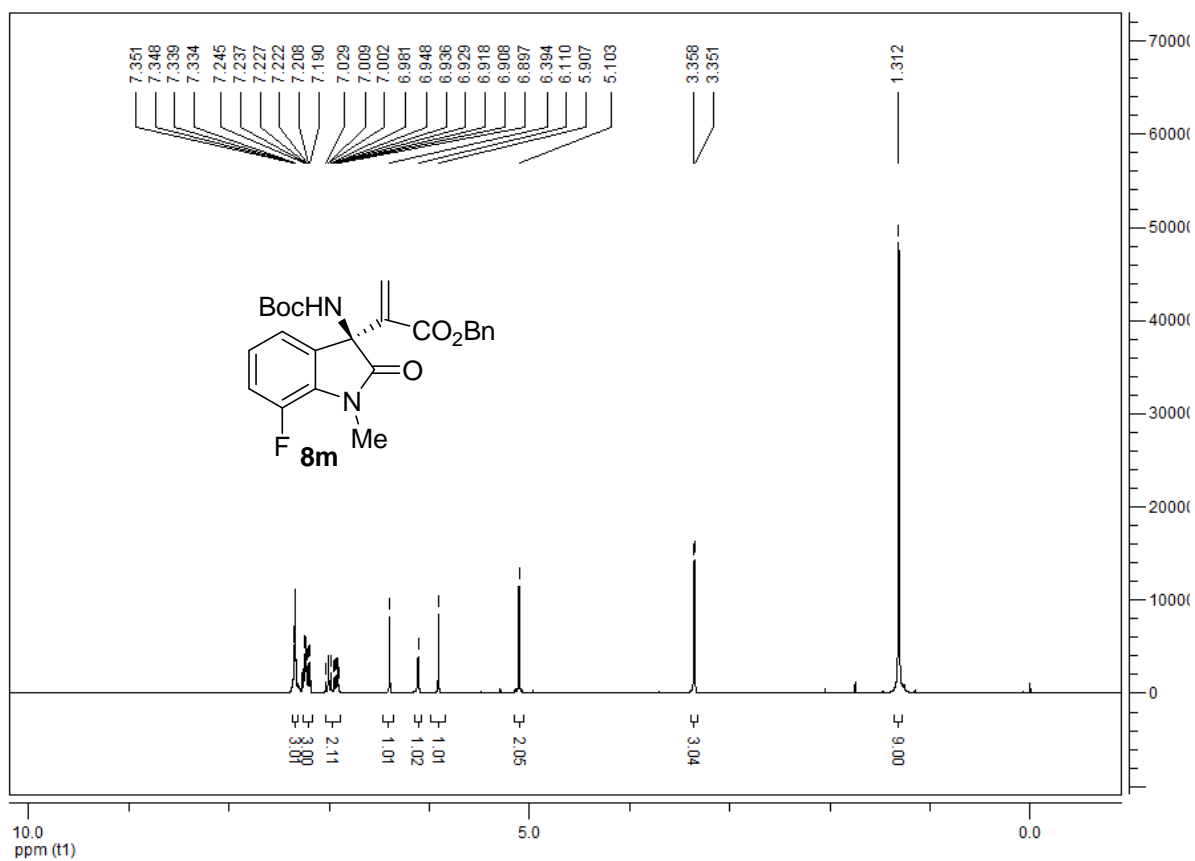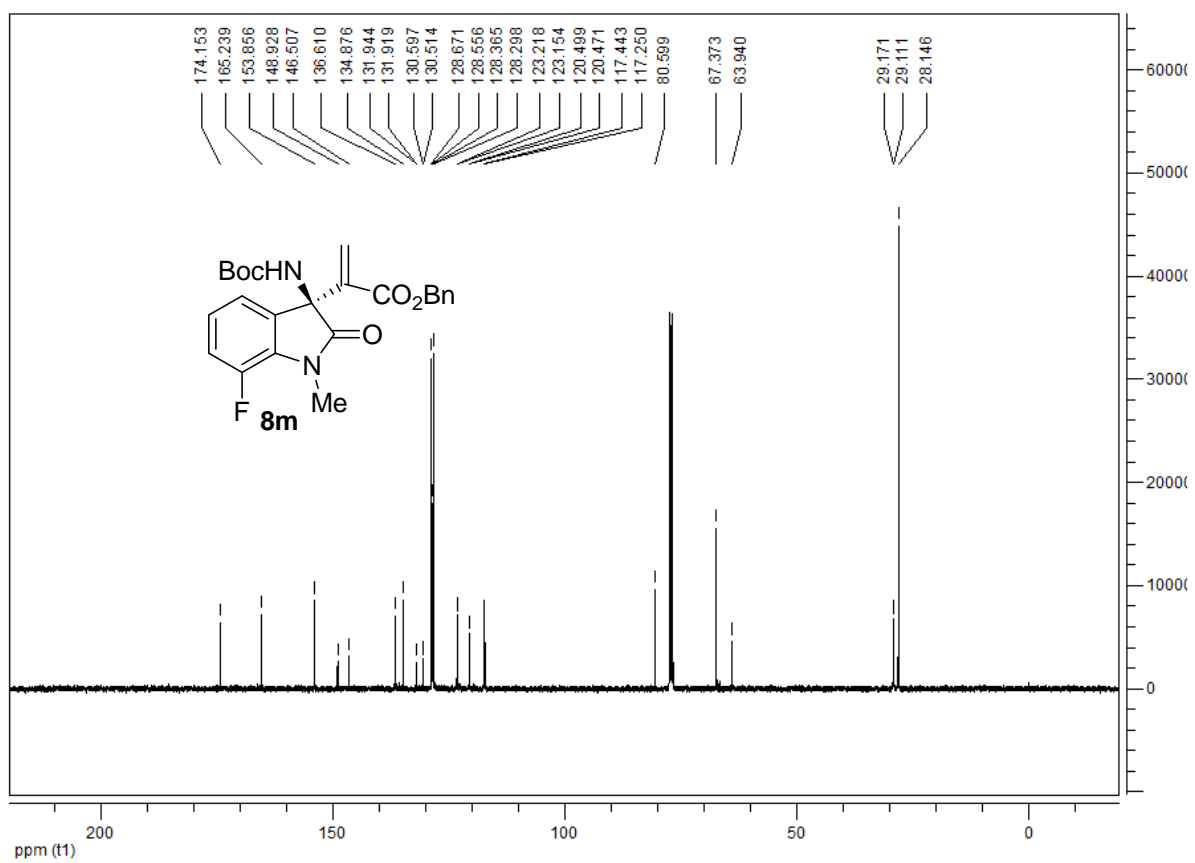

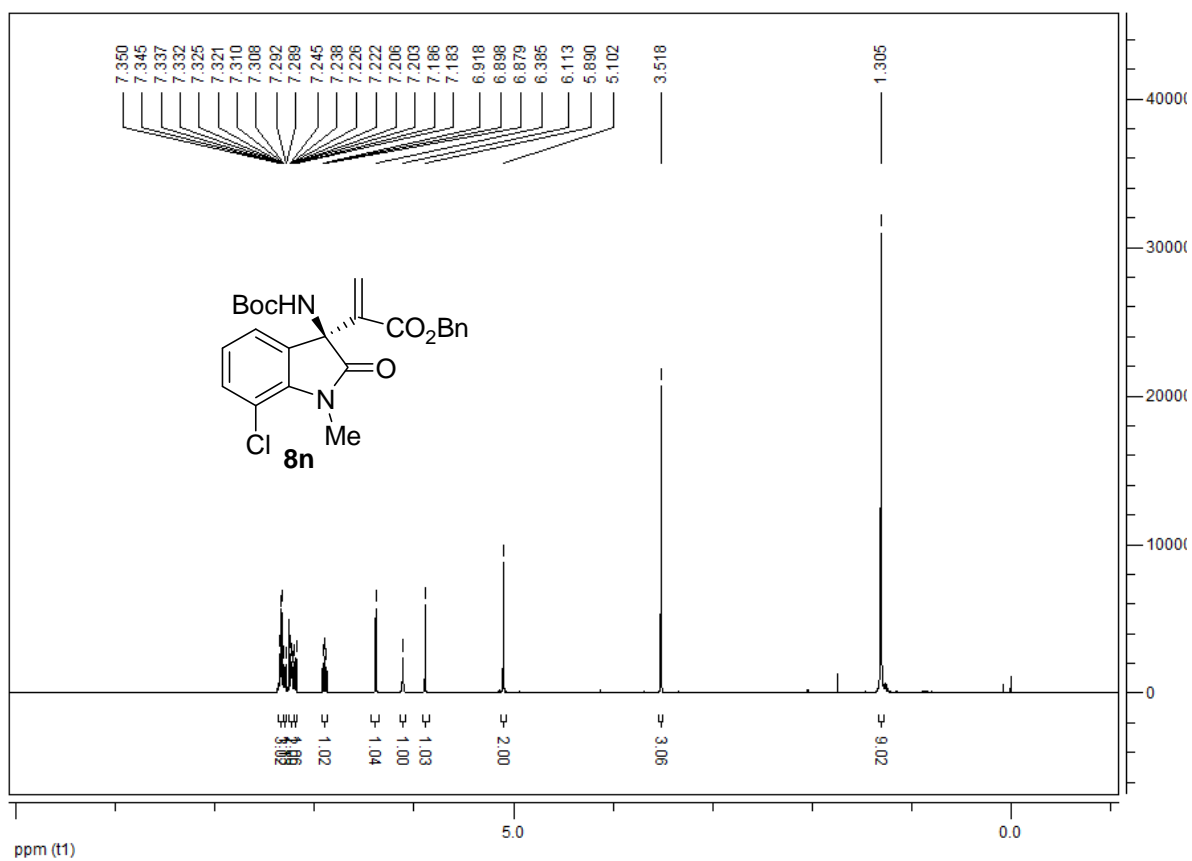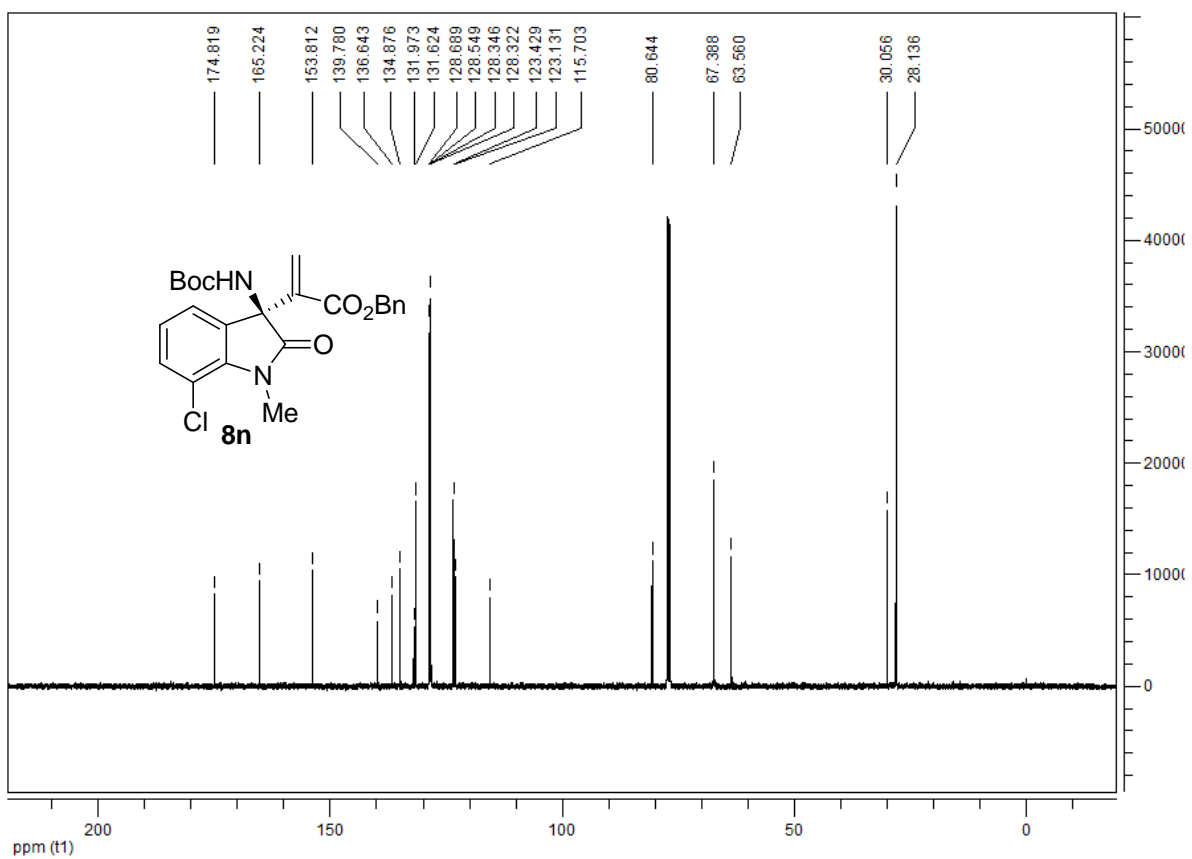

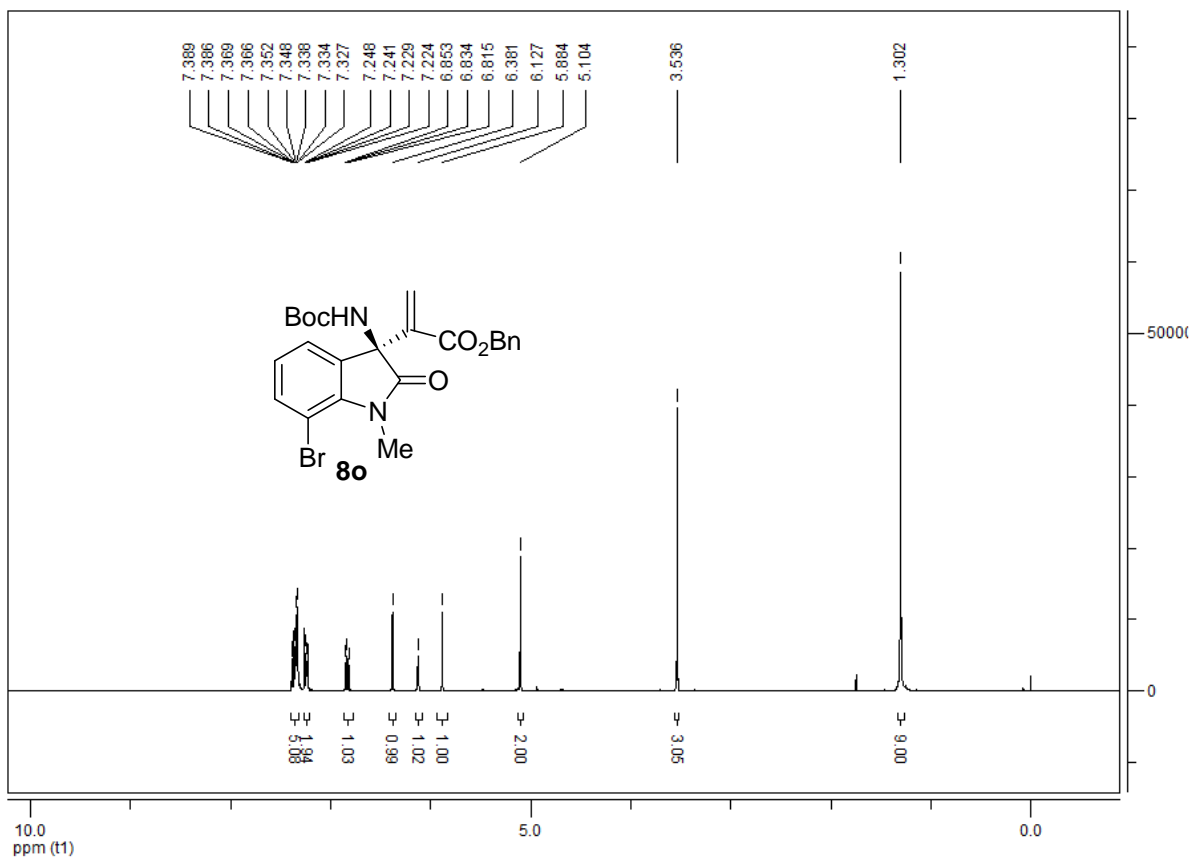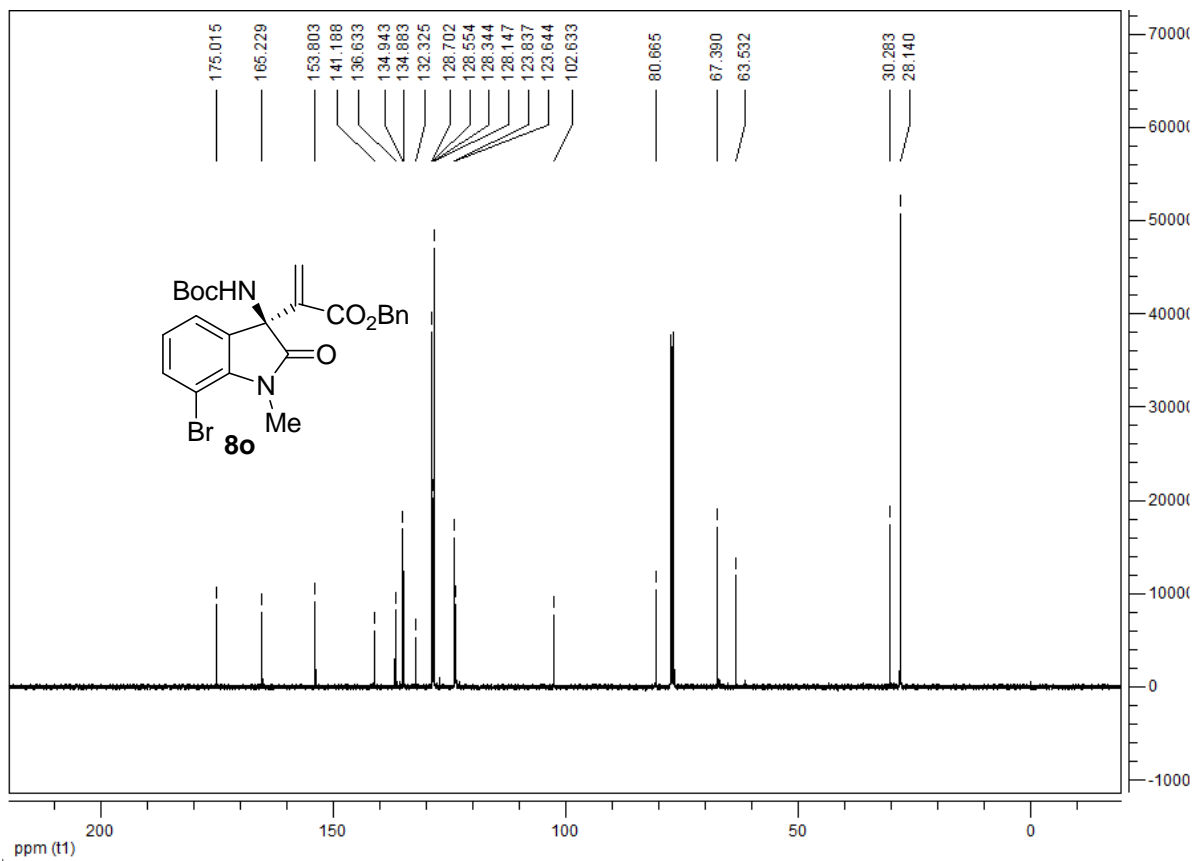

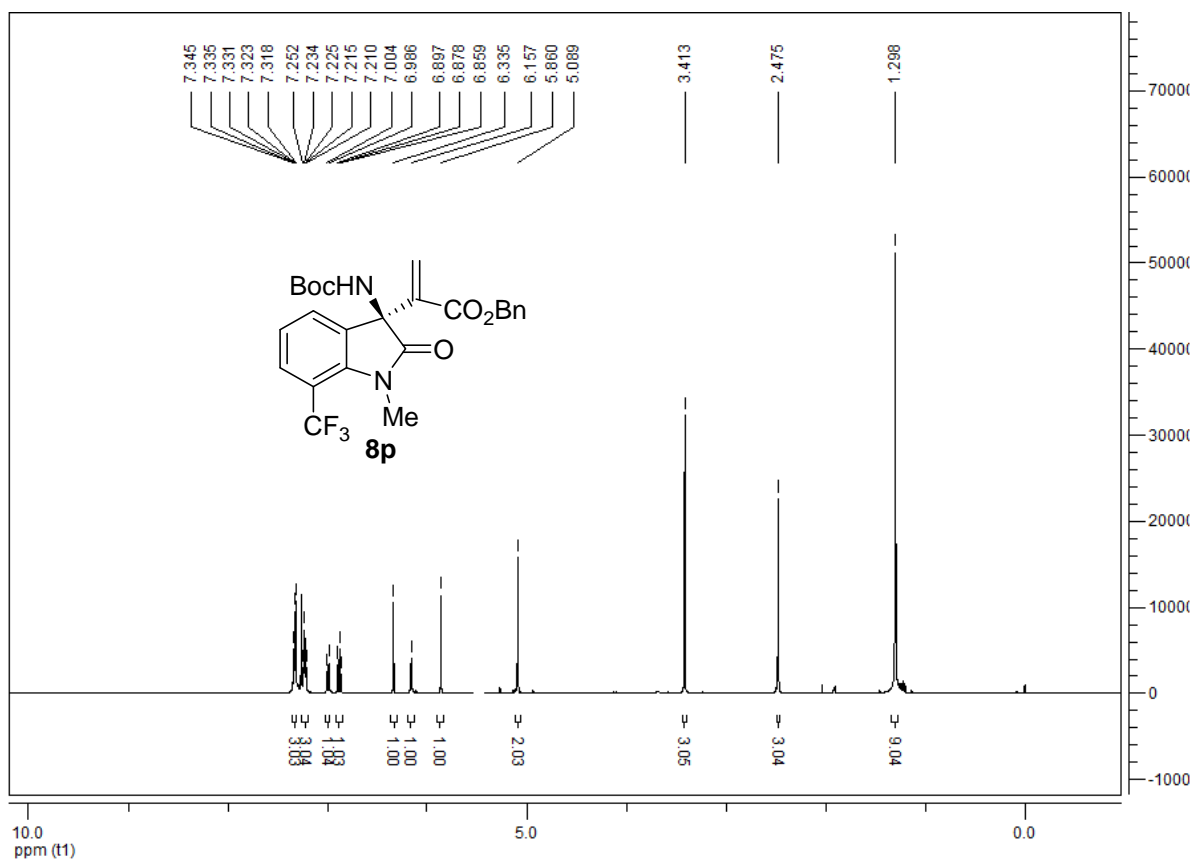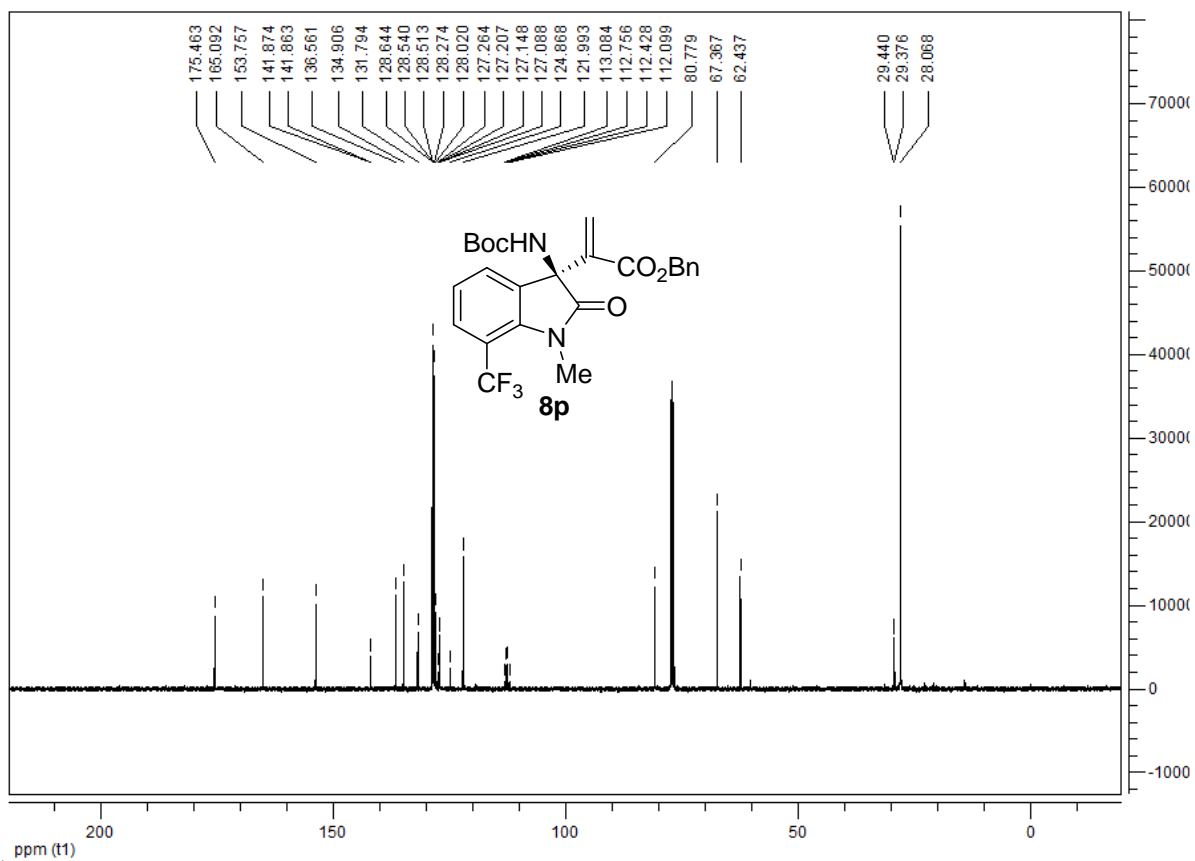

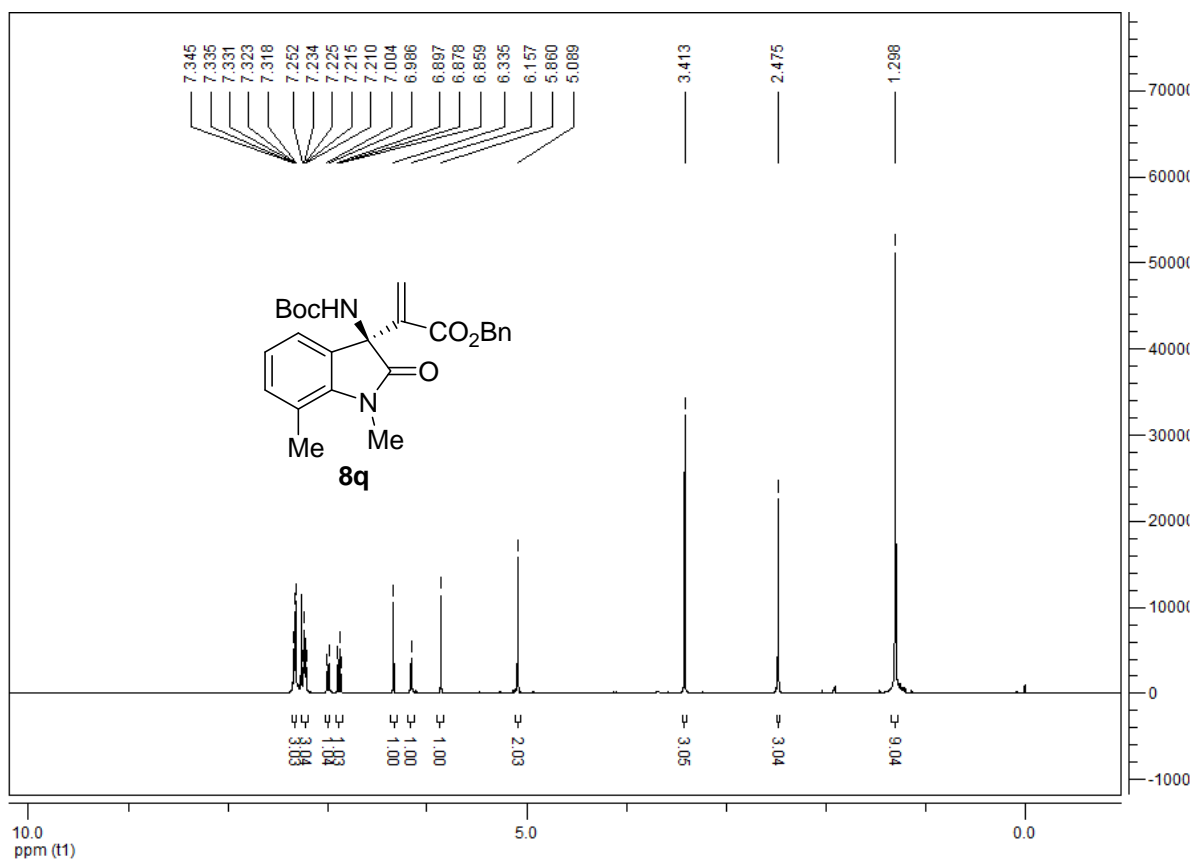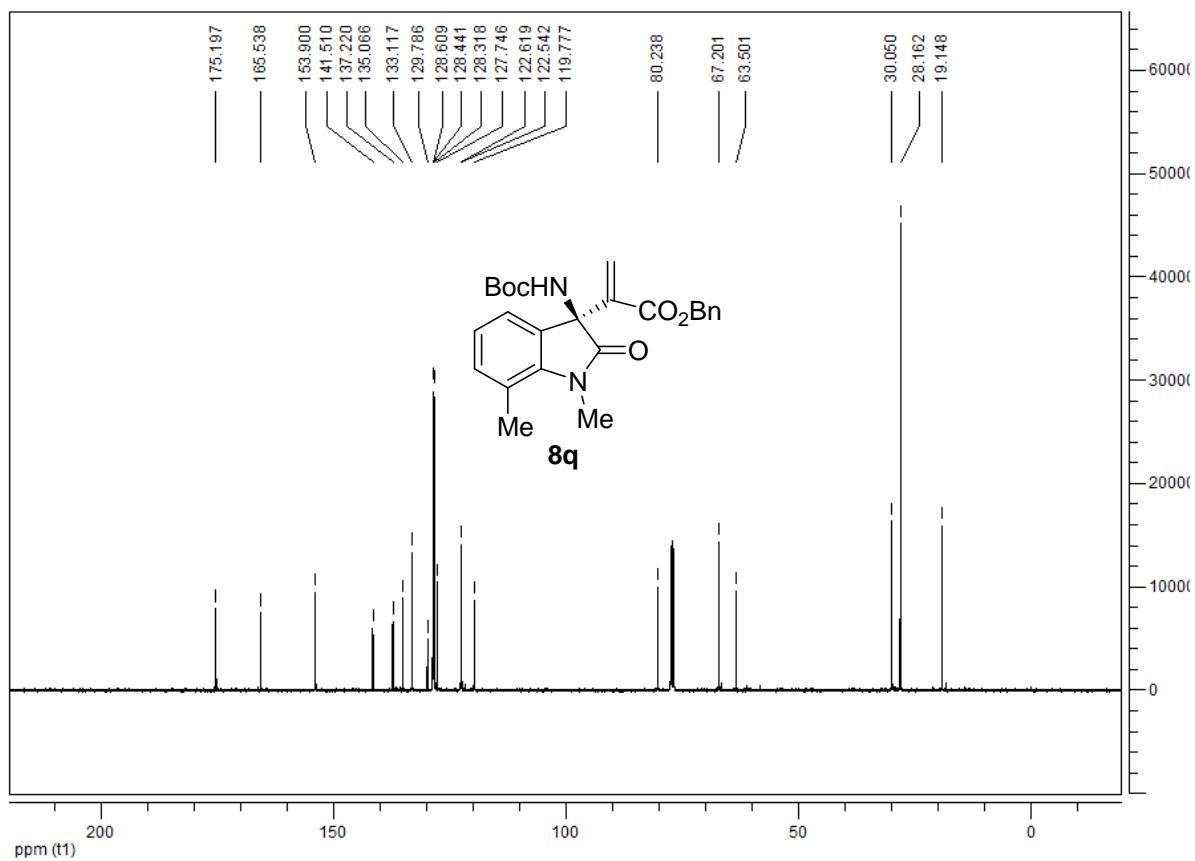

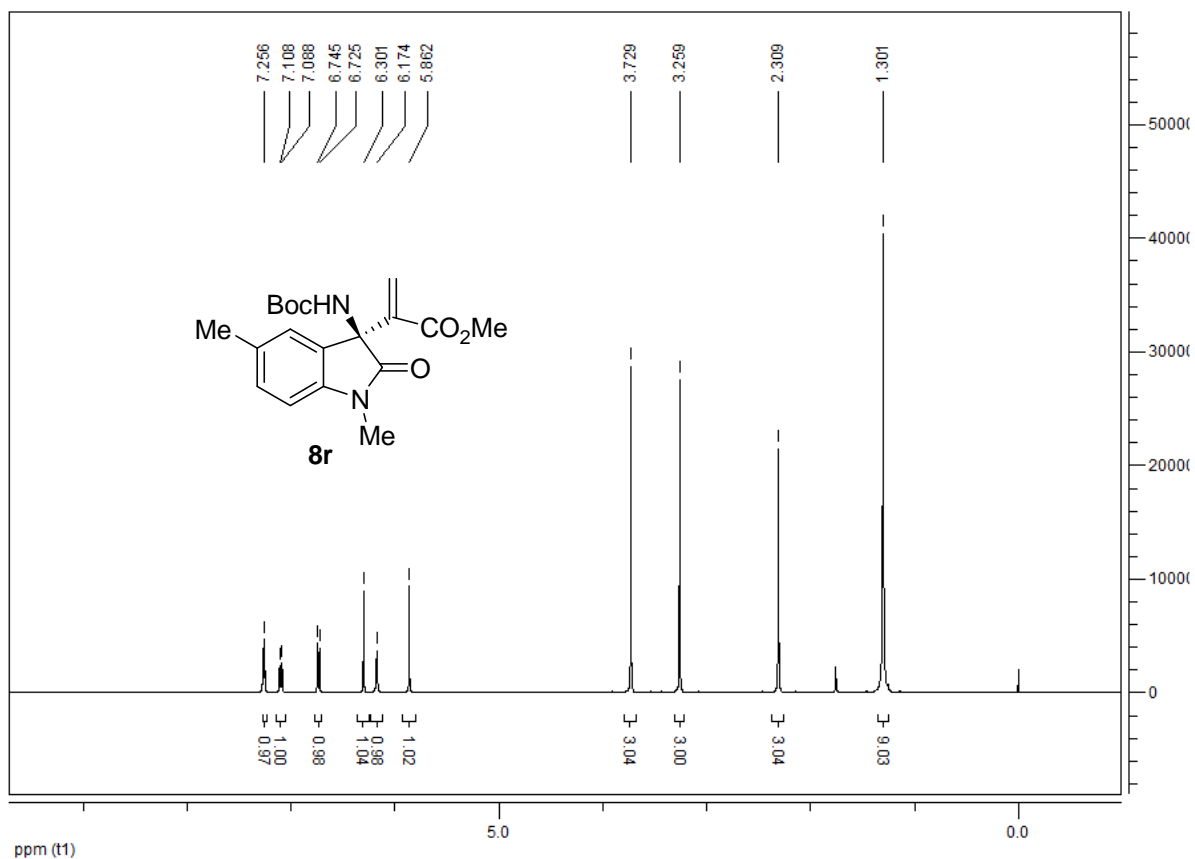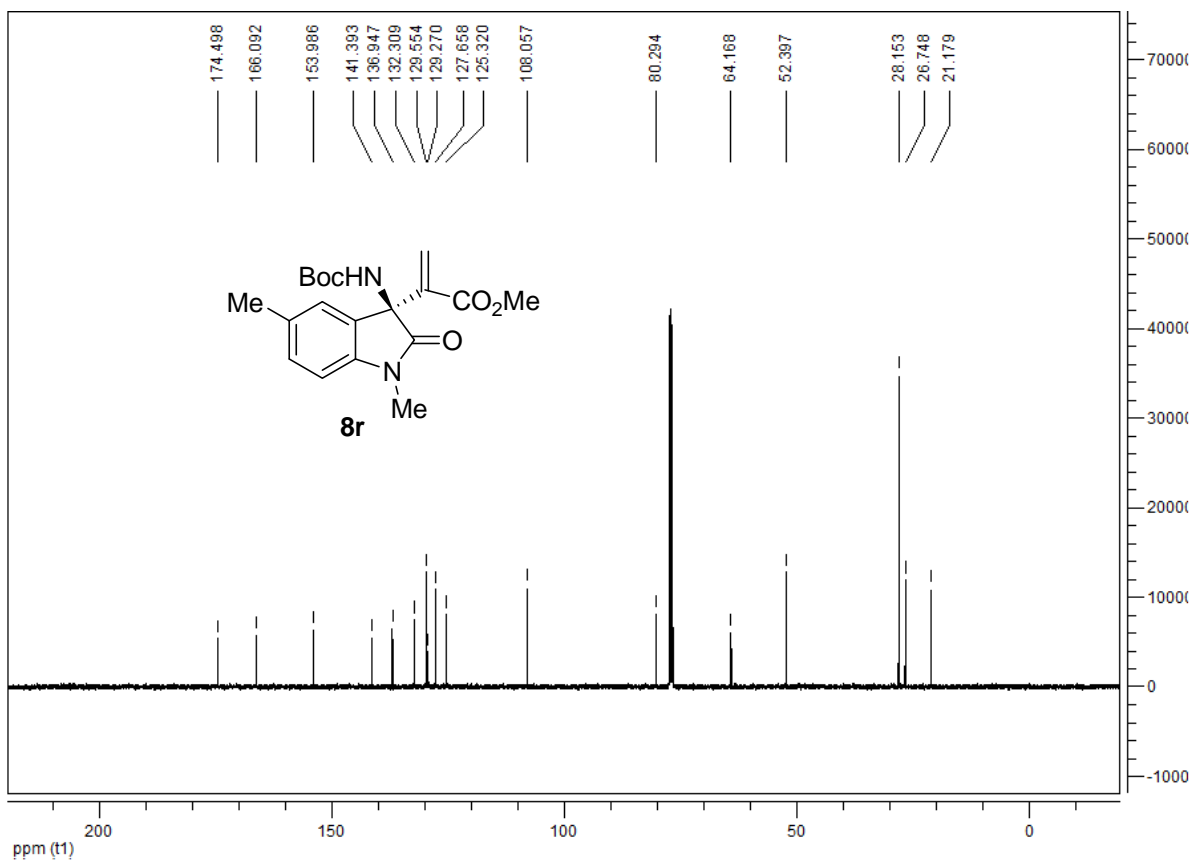



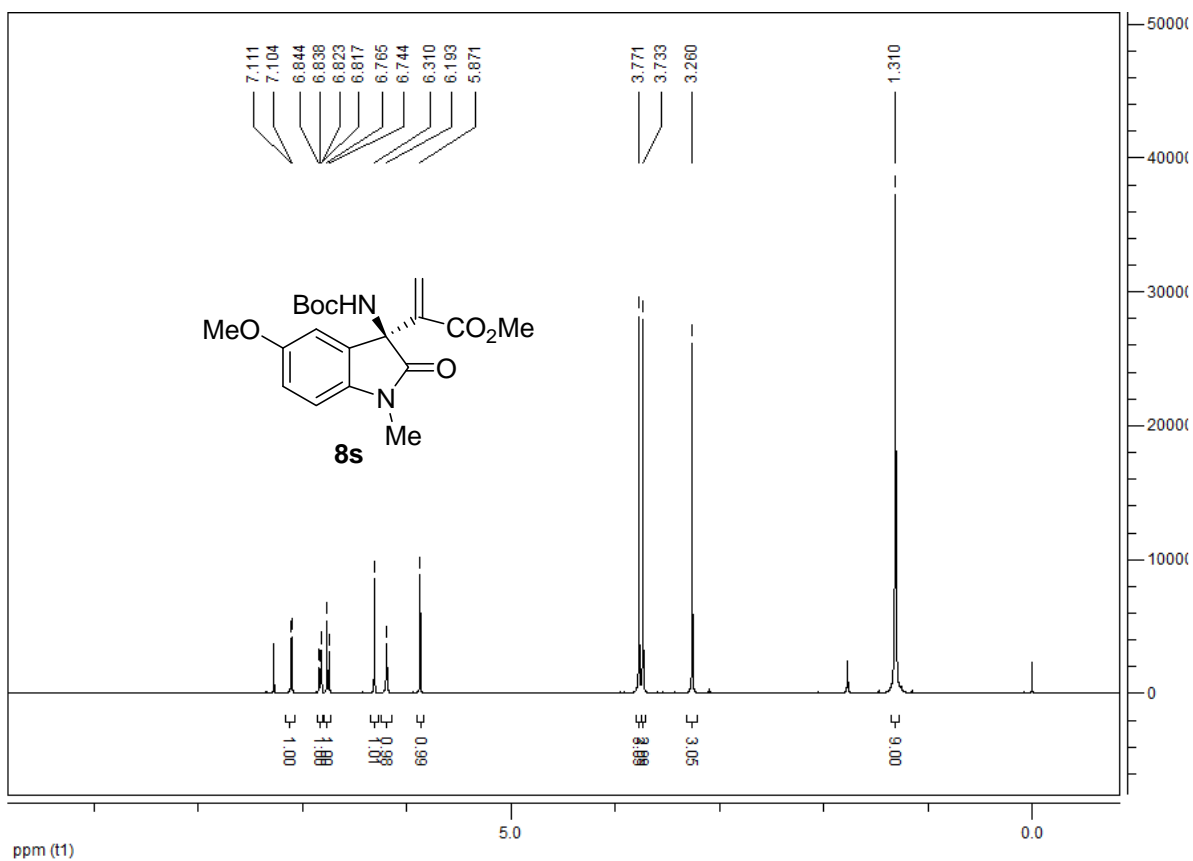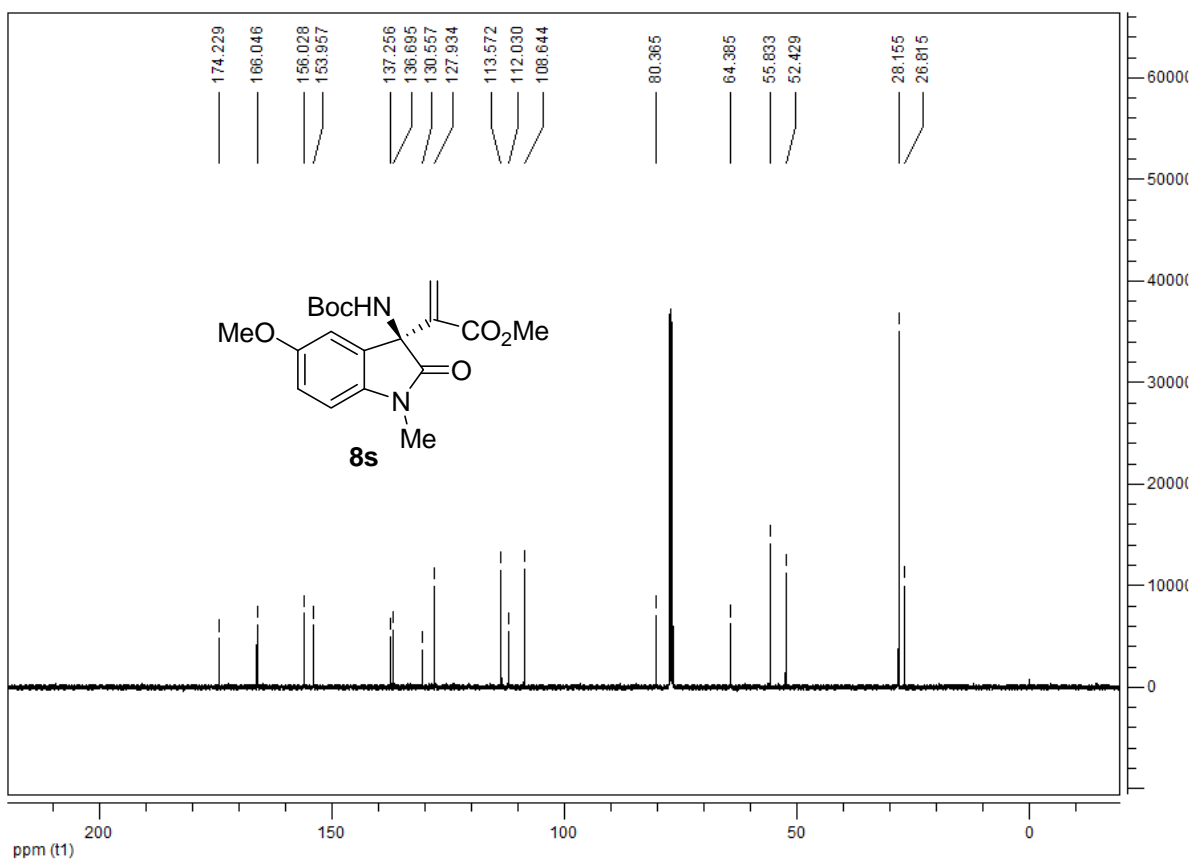

## 5. Copies of HPLC Spectra of Products 8a-s

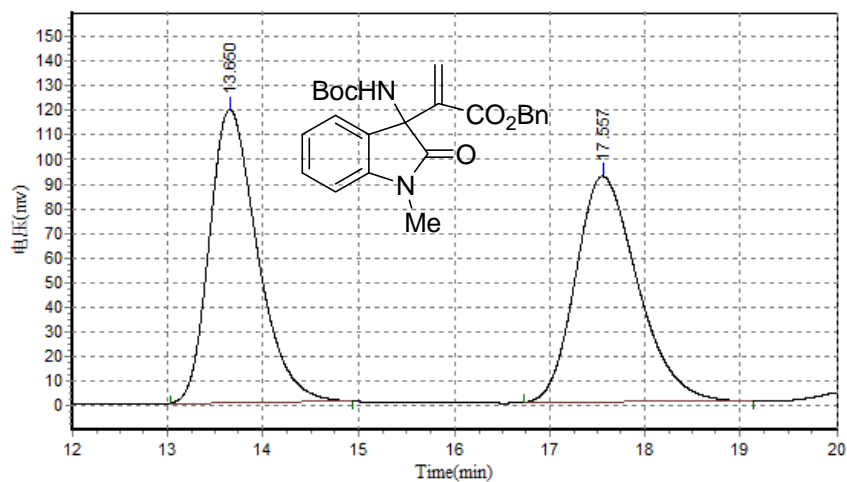

### Results

| Peak No.     | Peak ID | Ret Time | Height     | Area        | Conc.    |
|--------------|---------|----------|------------|-------------|----------|
| 1            |         | 13.650   | 119009.625 | 4158799.750 | 49.9616  |
| 2            |         | 17.557   | 91948.547  | 4165188.500 | 50.0384  |
| <b>Total</b> |         |          | 210958.172 | 8323988.250 | 100.0000 |

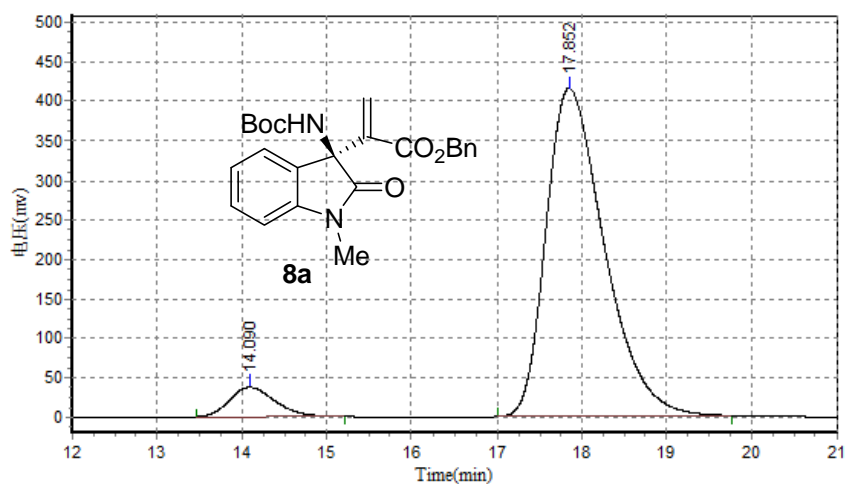

### Results

| Peak No.     | Peak ID | Ret Time | Height     | Area         | Conc.    |
|--------------|---------|----------|------------|--------------|----------|
| 1            |         | 14.090   | 37352.832  | 1400715.625  | 6.5764   |
| 2            |         | 17.852   | 416034.594 | 19898408.000 | 93.4236  |
| <b>Total</b> |         |          | 453387.426 | 21299123.625 | 100.0000 |

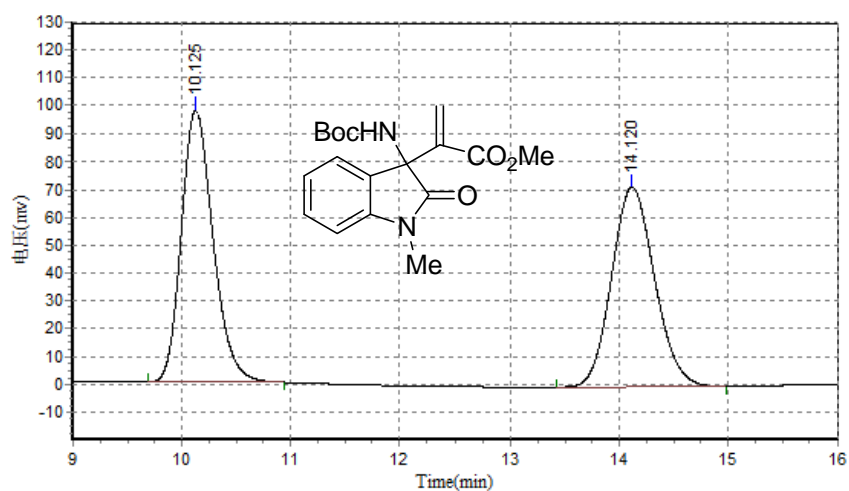

### Results

| Peak No.     | Peak ID | Ret Time | Height     | Area        | Conc.    |
|--------------|---------|----------|------------|-------------|----------|
| 1            |         | 10.125   | 97625.555  | 1981271.375 | 50.0572  |
| 2            |         | 14.120   | 71869.734  | 1976740.500 | 49.9428  |
| <b>Total</b> |         |          | 169495.289 | 3958011.875 | 100.0000 |

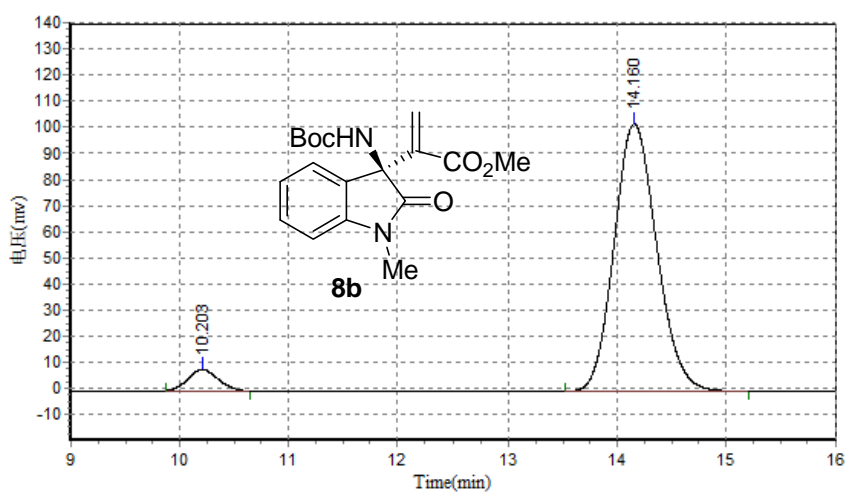

### Results

| Peak No.     | Peak ID | Ret Time | Height     | Area        | Conc.    |
|--------------|---------|----------|------------|-------------|----------|
| 1            |         | 10.203   | 8267.000   | 161453.297  | 5.4560   |
| 2            |         | 14.180   | 102575.133 | 2797747.500 | 94.5440  |
| <b>Total</b> |         |          | 110842.133 | 2959200.797 | 100.0000 |

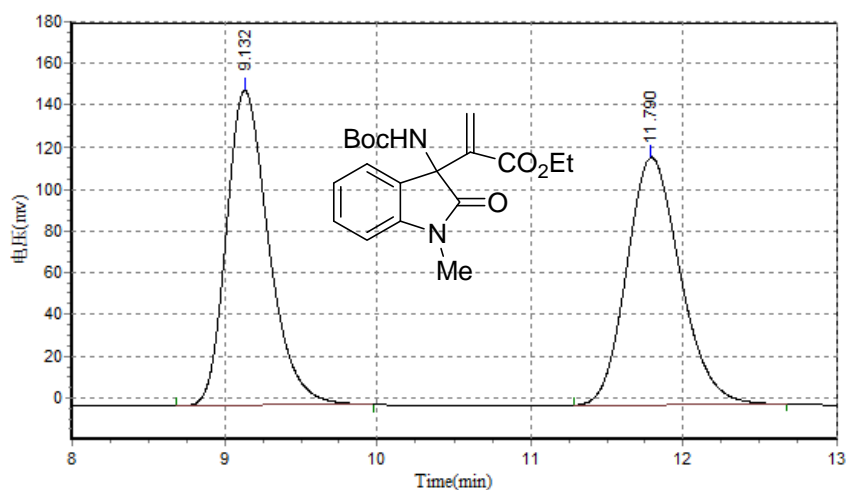

### Results

| Peak No.     | Peak ID | Ret Time | Height     | Area        | Conc.    |
|--------------|---------|----------|------------|-------------|----------|
| 1            |         | 9.132    | 150702.031 | 2906426.500 | 50.0907  |
| 2            |         | 11.790   | 118525.938 | 2895904.250 | 49.9093  |
| <b>Total</b> |         |          | 269227.969 | 5802330.750 | 100.0000 |

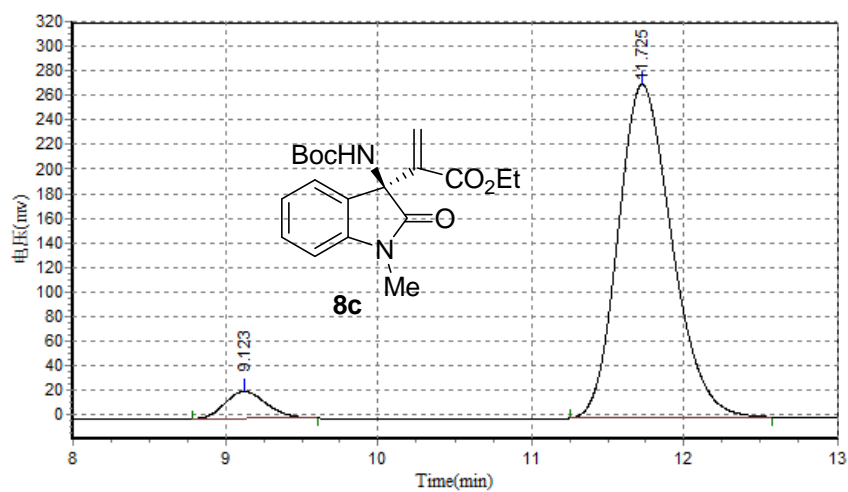

### Results

| Peak No.     | Peak ID | Ret Time | Height     | Area        | Conc.    |
|--------------|---------|----------|------------|-------------|----------|
| 1            |         | 9.123    | 22212.529  | 421884.938  | 5.9837   |
| 2            |         | 11.725   | 271179.063 | 6628733.000 | 94.0163  |
| <b>Total</b> |         |          | 293391.592 | 7050617.938 | 100.0000 |

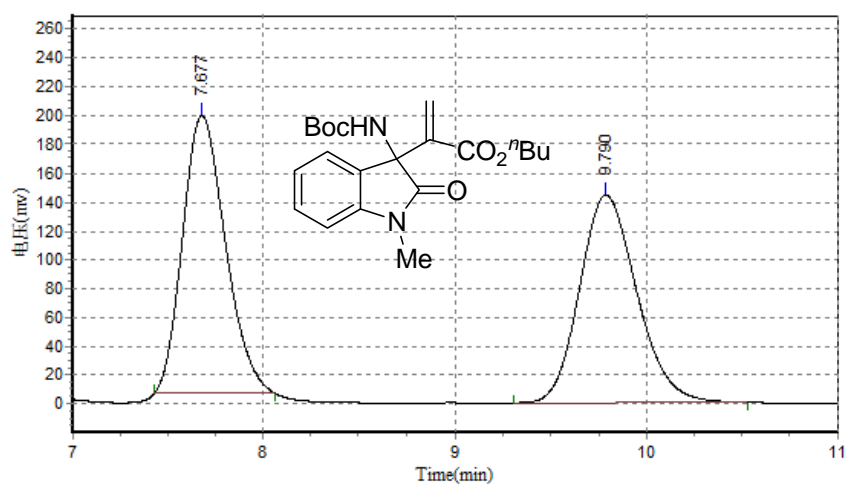

### Results

| Peak No.     | Peak ID | Ret Time | Height     | Area        | Conc.    |
|--------------|---------|----------|------------|-------------|----------|
| 1            |         | 7.677    | 192476.484 | 3005153.250 | 49.9404  |
| 2            |         | 9.790    | 144448.516 | 3012326.250 | 50.0596  |
| <b>Total</b> |         |          | 336925.000 | 6017479.500 | 100.0000 |

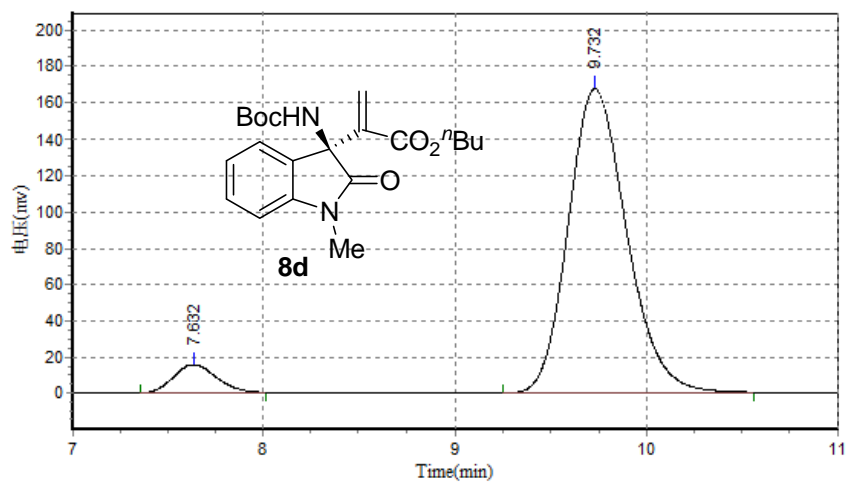

### Results

| Peak No.     | Peak ID | Ret Time | Height     | Area        | Conc.    |
|--------------|---------|----------|------------|-------------|----------|
| 1            |         | 7.632    | 15661.421  | 246720.734  | 6.4624   |
| 2            |         | 9.732    | 167491.563 | 3571046.250 | 93.5376  |
| <b>Total</b> |         |          | 183152.983 | 3817766.984 | 100.0000 |

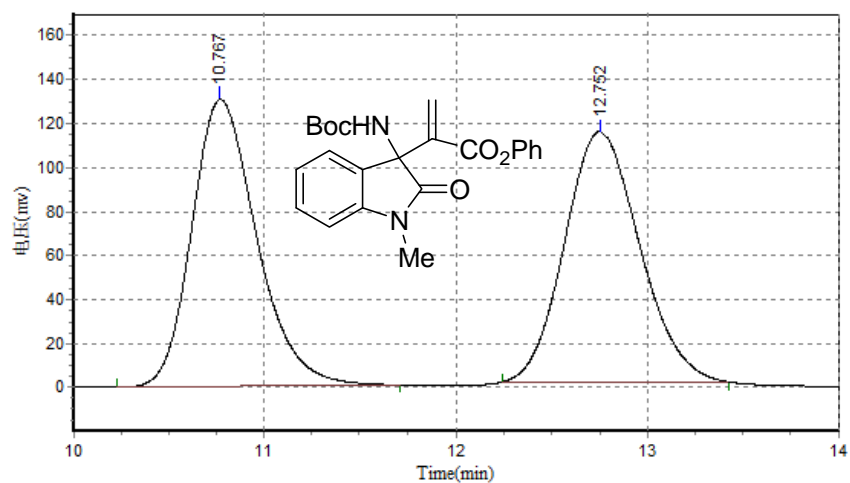

### Results

| Peak No.     | Peak ID | Ret Time | Height     | Area        | Conc.    |
|--------------|---------|----------|------------|-------------|----------|
| 1            |         | 10.767   | 130340.523 | 3091748.000 | 49.8179  |
| 2            |         | 12.752   | 113606.156 | 3114346.500 | 50.1821  |
| <b>Total</b> |         |          | 243946.680 | 6206094.500 | 100.0000 |

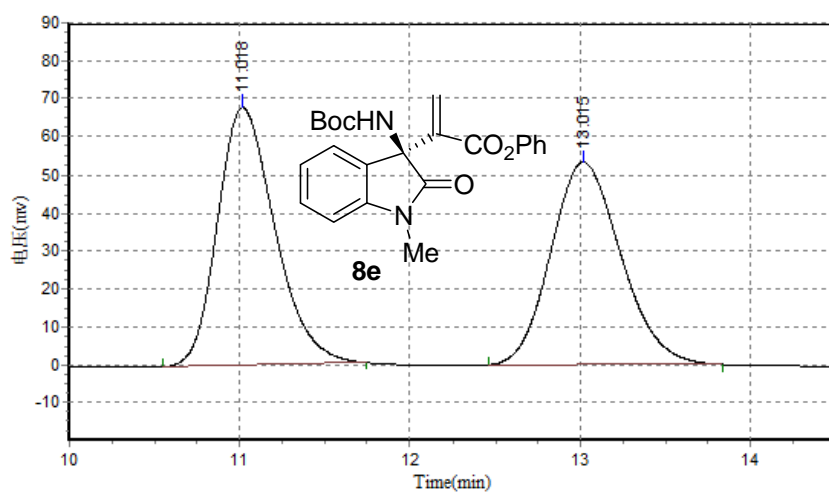

### Results

| Peak No.     | Peak ID | Ret Time | Height     | Area        | Conc.    |
|--------------|---------|----------|------------|-------------|----------|
| 1            |         | 11.018   | 67804.352  | 1591209.375 | 51.0208  |
| 2            |         | 13.015   | 53265.266  | 1527539.875 | 48.9792  |
| <b>Total</b> |         |          | 121069.617 | 3118749.250 | 100.0000 |

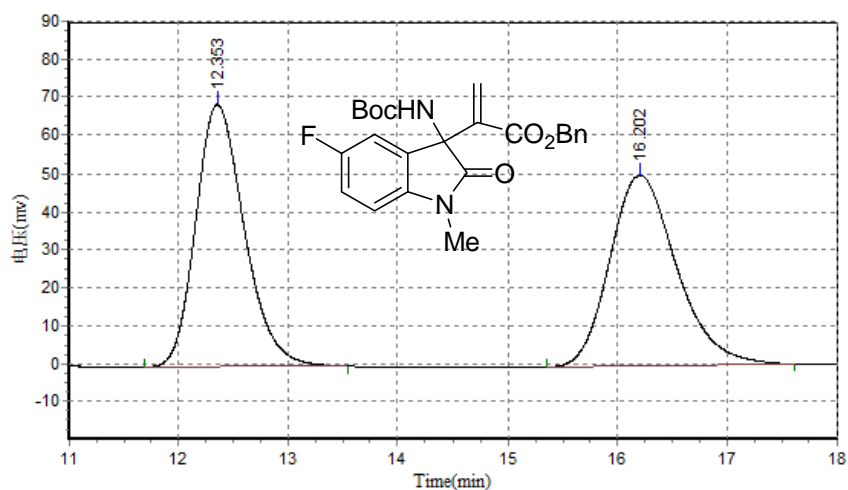

### Results

| Peak No.     | Peak ID | Ret Time | Height     | Area        | Conc.    |
|--------------|---------|----------|------------|-------------|----------|
| 1            |         | 12.353   | 68895.383  | 2130942.250 | 49.9547  |
| 2            |         | 16.202   | 50340.012  | 2134811.000 | 50.0453  |
| <b>Total</b> |         |          | 119235.395 | 4265753.250 | 100.0000 |

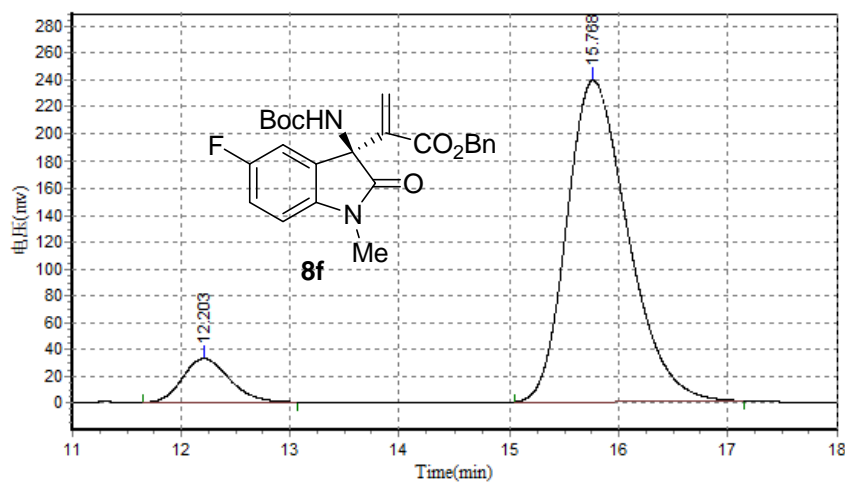

### Results

| Peak No.     | Peak ID | Ret Time | Height     | Area         | Conc.    |
|--------------|---------|----------|------------|--------------|----------|
| 1            |         | 12.203   | 32564.326  | 971983.188   | 9.4743   |
| 2            |         | 15.768   | 238440.797 | 9287163.000  | 90.5257  |
| <b>Total</b> |         |          | 271005.123 | 10259146.188 | 100.0000 |

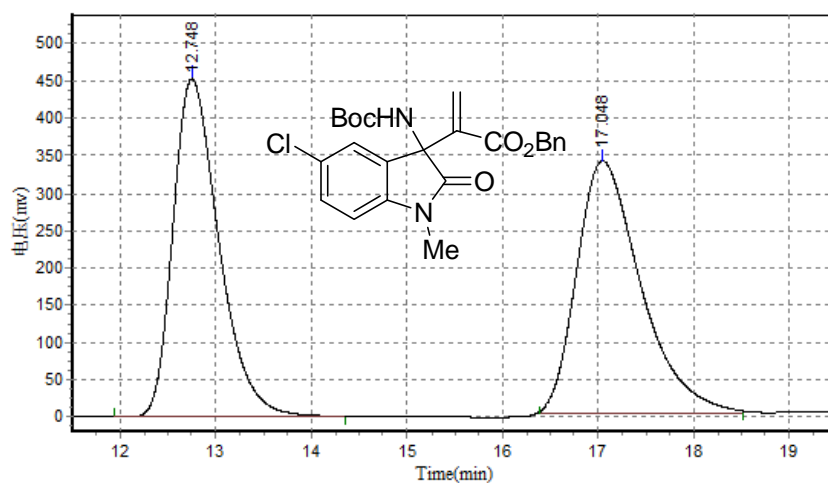

### Results

| Peak No.     | Peak ID | Ret Time | Height     | Area         | Conc.    |
|--------------|---------|----------|------------|--------------|----------|
| 1            |         | 12.748   | 452441.156 | 15179017.000 | 49.9529  |
| 2            |         | 17.048   | 333118.125 | 15207620.000 | 50.0471  |
| <b>Total</b> |         |          | 785559.281 | 30386637.000 | 100.0000 |

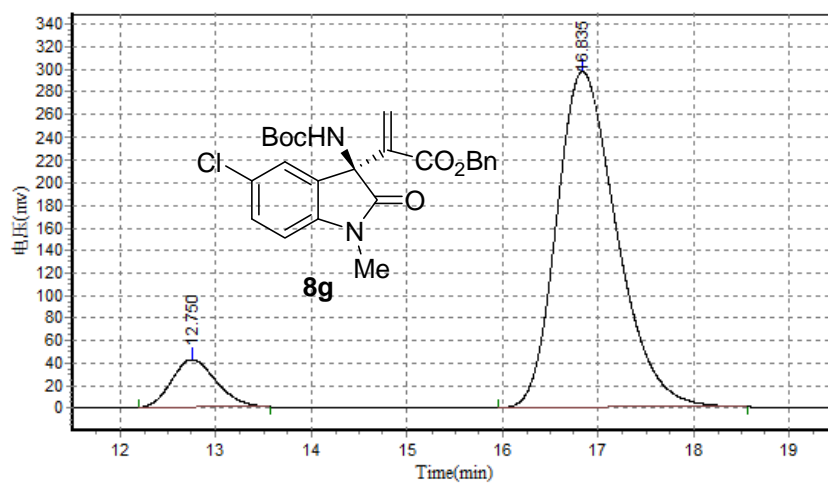

### Results

| Peak No.     | Peak ID | Ret Time | Height     | Area         | Conc.    |
|--------------|---------|----------|------------|--------------|----------|
| 1            |         | 12.750   | 42508.176  | 1383968.625  | 9.5648   |
| 2            |         | 16.835   | 298132.875 | 13085478.000 | 90.4352  |
| <b>Total</b> |         |          | 340641.051 | 14469446.625 | 100.0000 |



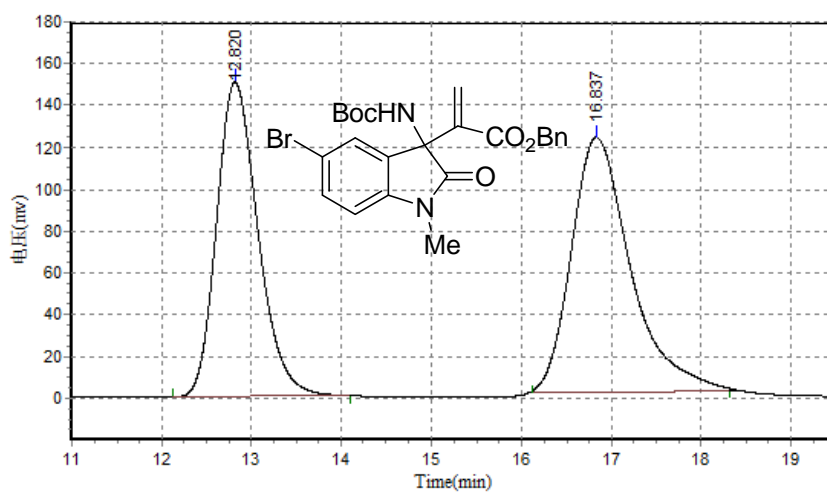

### Results

| Peak No.     | Peak ID | Ret Time | Height     | Area        | Conc.    |
|--------------|---------|----------|------------|-------------|----------|
| 1            |         | 12.820   | 150352.453 | 4834646.500 | 50.0081  |
| 2            |         | 16.837   | 114116.117 | 4833071.500 | 49.9919  |
| <b>Total</b> |         |          | 264468.570 | 9667718.000 | 100.0000 |

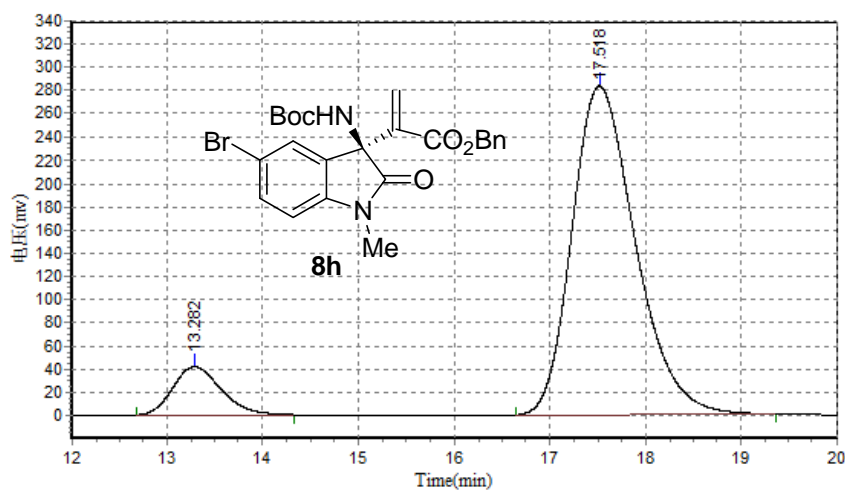

### Results

| Peak No.     | Peak ID | Ret Time | Height     | Area         | Conc.    |
|--------------|---------|----------|------------|--------------|----------|
| 1            |         | 13.282   | 41696.633  | 1469458.250  | 10.0800  |
| 2            |         | 17.518   | 283274.781 | 13108515.000 | 89.9200  |
| <b>Total</b> |         |          | 324971.414 | 14577973.250 | 100.0000 |

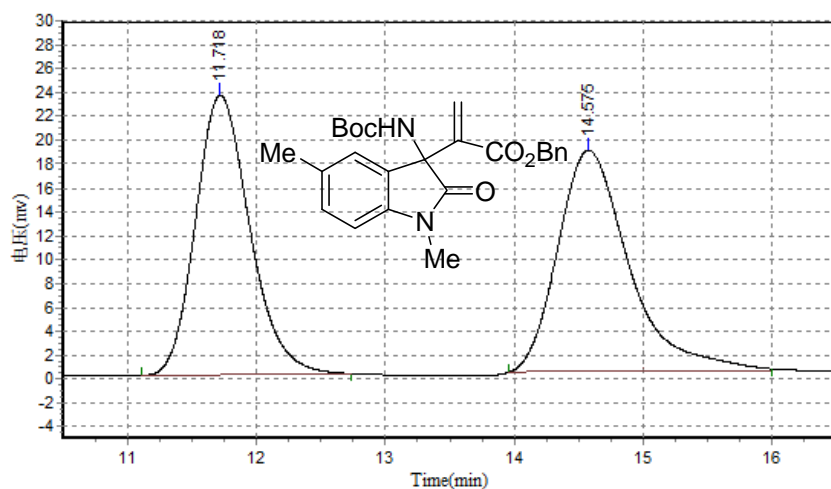

### Results

| Peak No.     | Peak ID | Ret Time | Height    | Area        | Conc.    |
|--------------|---------|----------|-----------|-------------|----------|
| 1            |         | 11.718   | 23400.498 | 686112.188  | 49.9415  |
| 2            |         | 14.575   | 18379.338 | 687719.875  | 50.0585  |
| <b>Total</b> |         |          | 41779.836 | 1373832.063 | 100.0000 |

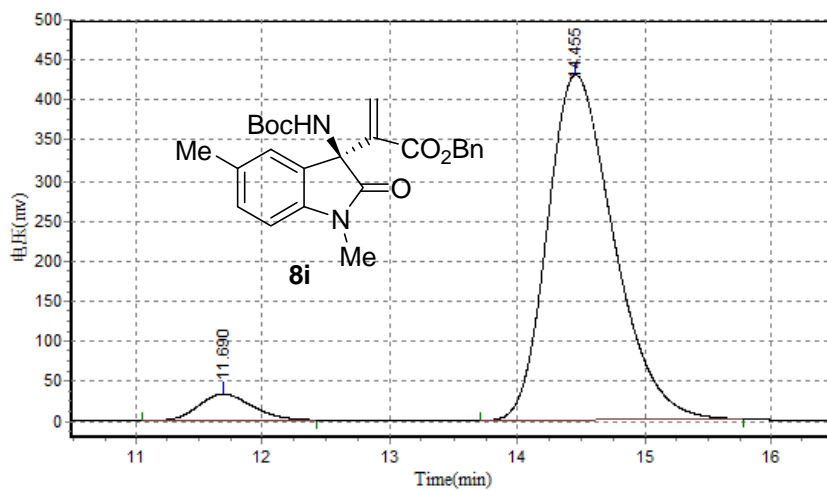

### Results

| Peak No.     | Peak ID | Ret Time | Height     | Area         | Conc.    |
|--------------|---------|----------|------------|--------------|----------|
| 1            |         | 11.690   | 32828.086  | 967663.250   | 5.8364   |
| 2            |         | 14.455   | 430436.875 | 15612158.000 | 94.1636  |
| <b>Total</b> |         |          | 463264.961 | 16379821.250 | 100.0000 |

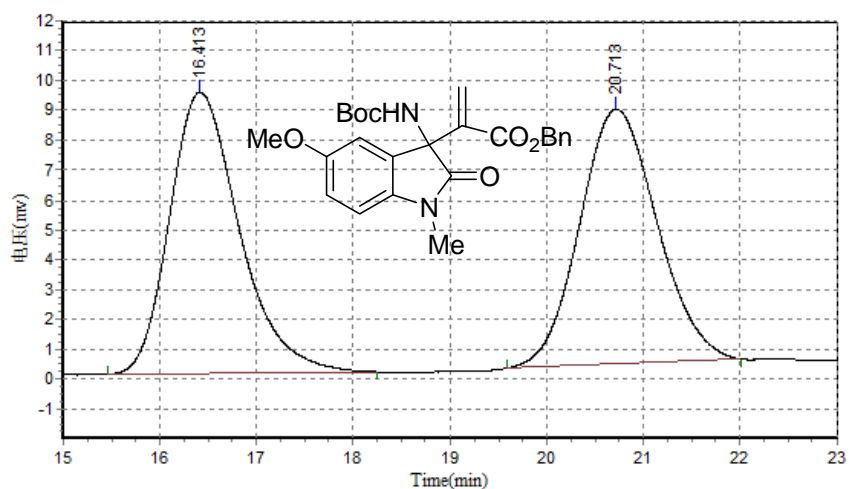

### Results

| Peak No.     | Peak ID | Ret Time | Height    | Area       | Conc.    |
|--------------|---------|----------|-----------|------------|----------|
| 1            |         | 16.413   | 9422.454  | 474676.406 | 49.9410  |
| 2            |         | 20.713   | 8516.694  | 475798.563 | 50.0590  |
| <b>Total</b> |         |          | 17939.148 | 950474.969 | 100.0000 |

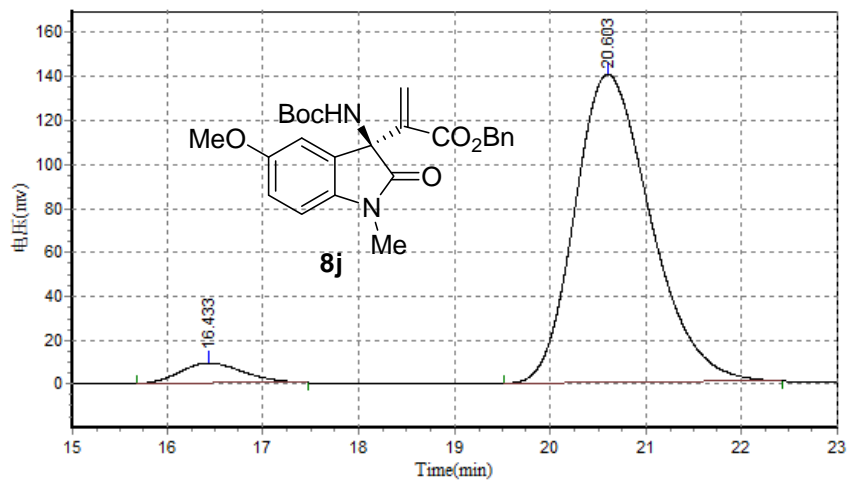

### Results

| Peak No.     | Peak ID | Ret Time | Height     | Area        | Conc.    |
|--------------|---------|----------|------------|-------------|----------|
| 1            |         | 16.433   | 9188.699   | 429528.719  | 5.2381   |
| 2            |         | 20.603   | 140244.031 | 7770582.000 | 94.7619  |
| <b>Total</b> |         |          | 149432.730 | 8200110.719 | 100.0000 |

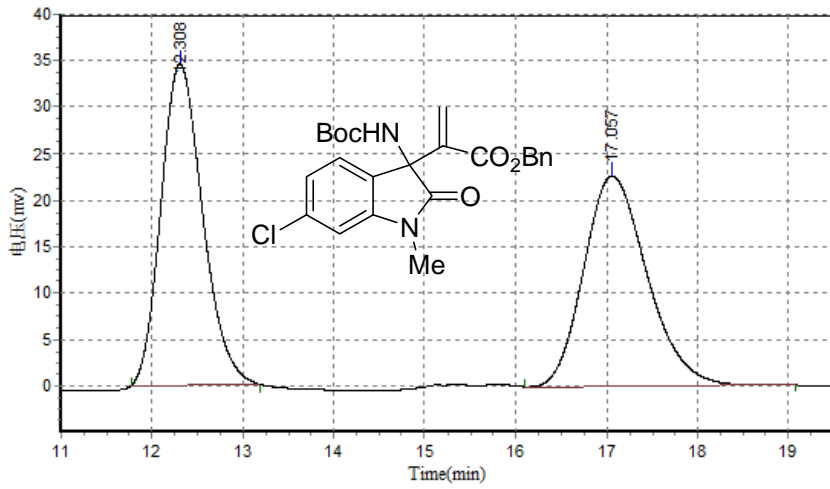

### Results

| Peak No.     | Peak ID | Ret Time | Height    | Area        | Conc.    |
|--------------|---------|----------|-----------|-------------|----------|
| 1            |         | 12.308   | 34612.512 | 1103508.250 | 49.9961  |
| 2            |         | 17.057   | 22772.836 | 1103679.375 | 50.0039  |
| <b>Total</b> |         |          | 57385.348 | 2207187.625 | 100.0000 |

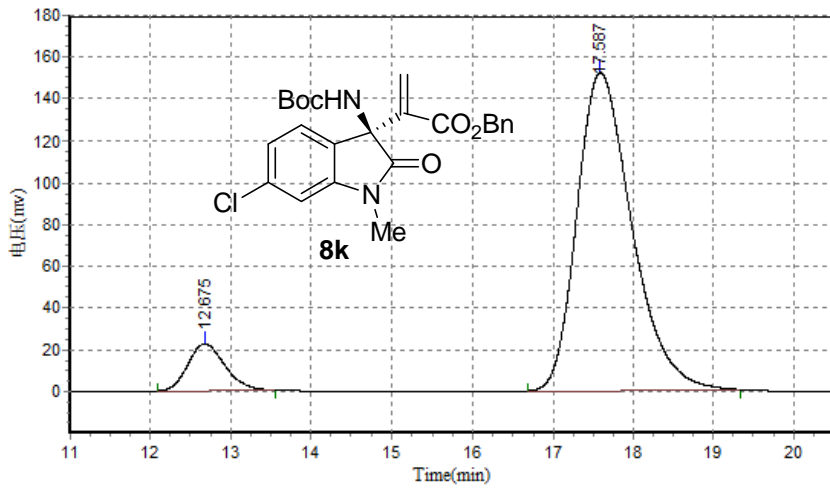

### Results

| Peak No.     | Peak ID | Ret Time | Height     | Area        | Conc.    |
|--------------|---------|----------|------------|-------------|----------|
| 1            |         | 12.675   | 22477.961  | 720924.875  | 9.0537   |
| 2            |         | 17.587   | 152102.359 | 7241861.500 | 90.9463  |
| <b>Total</b> |         |          | 174580.320 | 7962786.375 | 100.0000 |

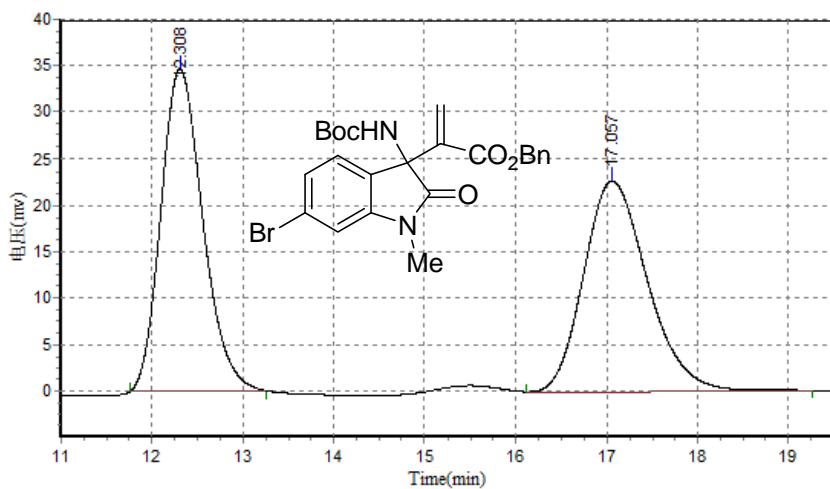

### Results

| Peak No.     | Peak ID | Ret Time | Height    | Area        | Conc.    |
|--------------|---------|----------|-----------|-------------|----------|
| 1            |         | 12.308   | 34729.063 | 1114175.125 | 50.1153  |
| 2            |         | 17.057   | 22793.830 | 1109047.250 | 49.8847  |
| <b>Total</b> |         |          | 57522.893 | 2223222.375 | 100.0000 |

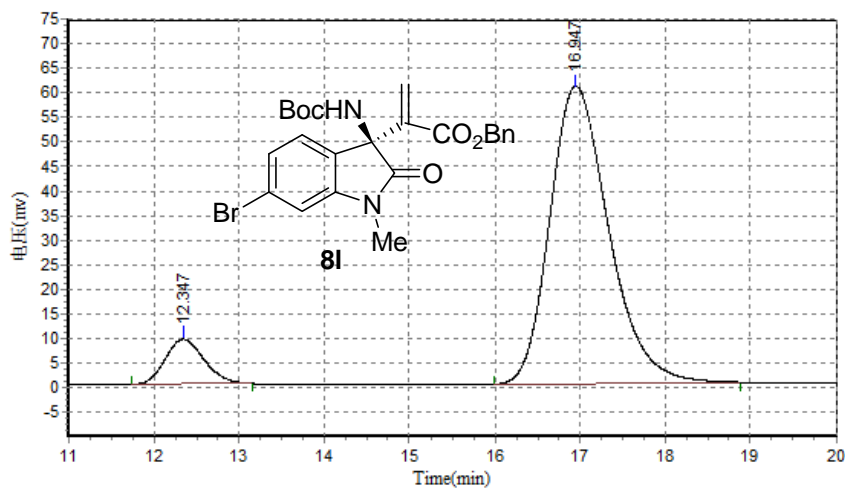

### Results

| Peak No.     | Peak ID | Ret Time | Height    | Area        | Conc.    |
|--------------|---------|----------|-----------|-------------|----------|
| 1            |         | 12.347   | 9183.613  | 293553.906  | 9.1543   |
| 2            |         | 16.947   | 60582.441 | 2913179.500 | 90.8457  |
| <b>Total</b> |         |          | 69766.055 | 3206733.406 | 100.0000 |

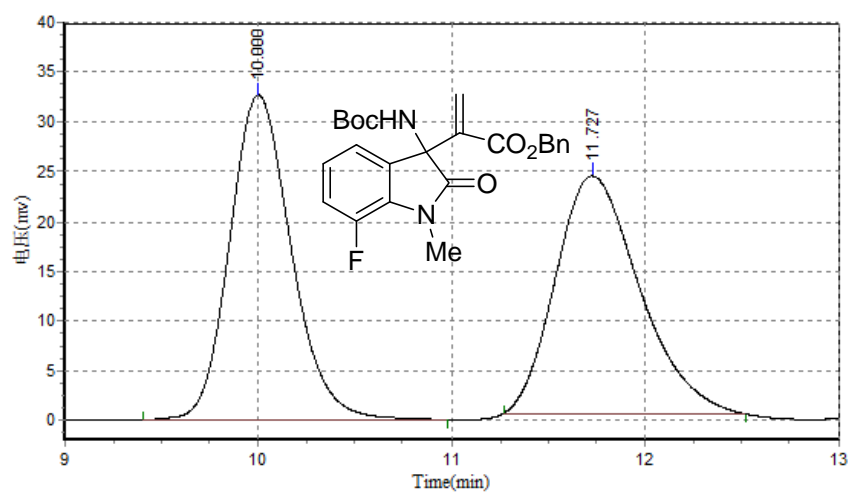

### Results

| Peak No.     | Peak ID | Ret Time | Height    | Area        | Conc.    |
|--------------|---------|----------|-----------|-------------|----------|
| 1            |         | 10.000   | 32711.574 | 724781.563  | 49.9716  |
| 2            |         | 11.727   | 23980.967 | 725606.375  | 50.0284  |
| <b>Total</b> |         |          | 56692.541 | 1450387.938 | 100.0000 |

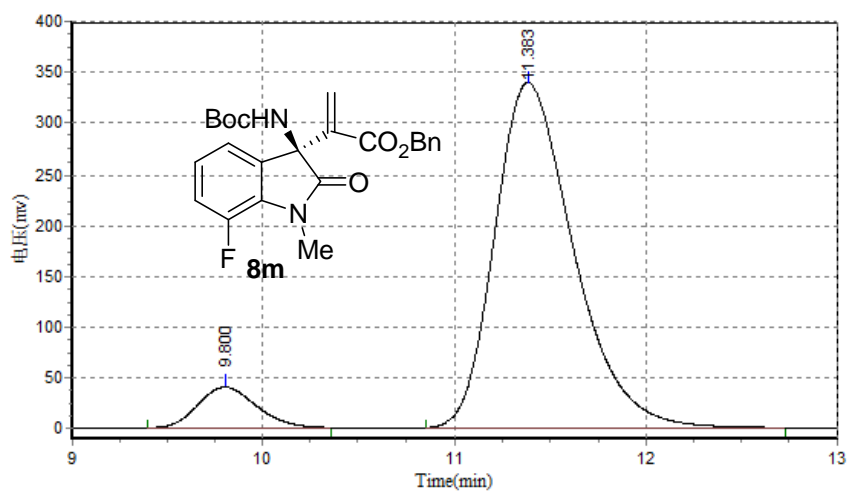

### Results

| Peak No.     | Peak ID | Ret Time | Height     | Area         | Conc.    |
|--------------|---------|----------|------------|--------------|----------|
| 1            |         | 9.800    | 40074.539  | 854112.125   | 8.0611   |
| 2            |         | 11.383   | 339246.813 | 9741321.000  | 91.9389  |
| <b>Total</b> |         |          | 379321.352 | 10595433.125 | 100.0000 |

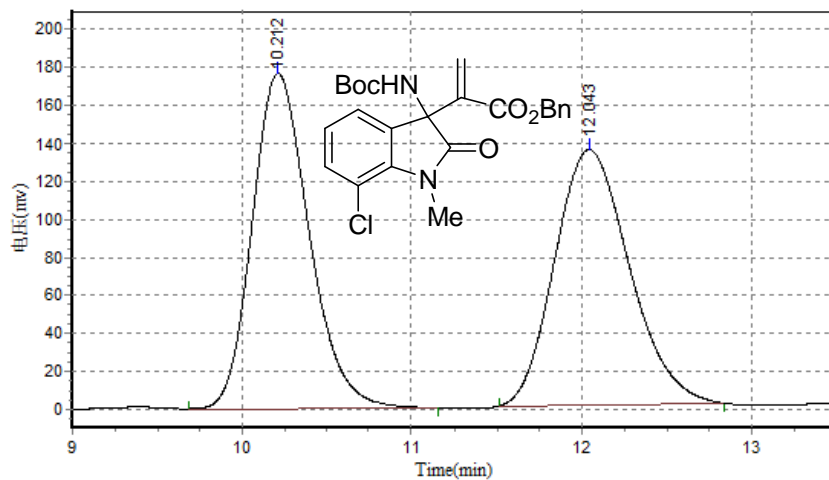

### Results

| Peak No.     | Peak ID | Ret Time | Height     | Area        | Conc.    |
|--------------|---------|----------|------------|-------------|----------|
| 1            |         | 10.212   | 176676.891 | 4111445.250 | 49.9033  |
| 2            |         | 12.043   | 134509.859 | 4127372.750 | 50.0967  |
| <b>Total</b> |         |          | 311186.750 | 8238818.000 | 100.0000 |

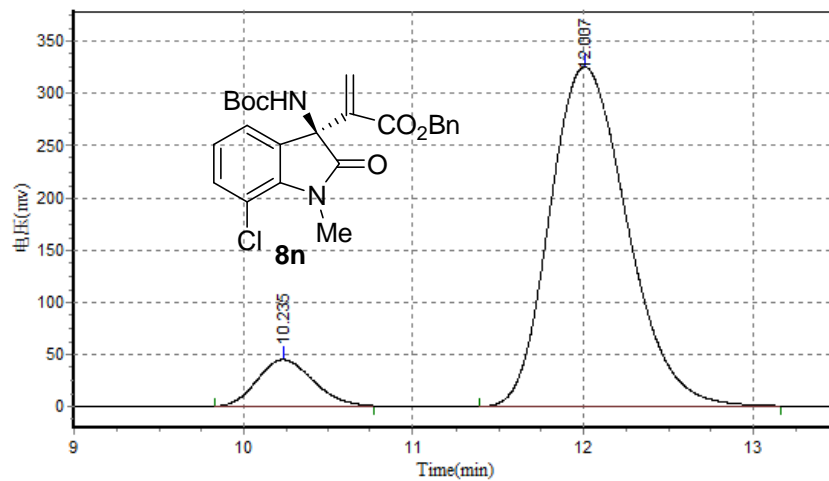

### Results

| Peak No.     | Peak ID | Ret Time | Height     | Area         | Conc.    |
|--------------|---------|----------|------------|--------------|----------|
| 1            |         | 10.235   | 44801.563  | 1025175.500  | 9.0253   |
| 2            |         | 12.007   | 325093.594 | 10333725.000 | 90.9747  |
| <b>Total</b> |         |          | 369895.156 | 11358900.500 | 100.0000 |

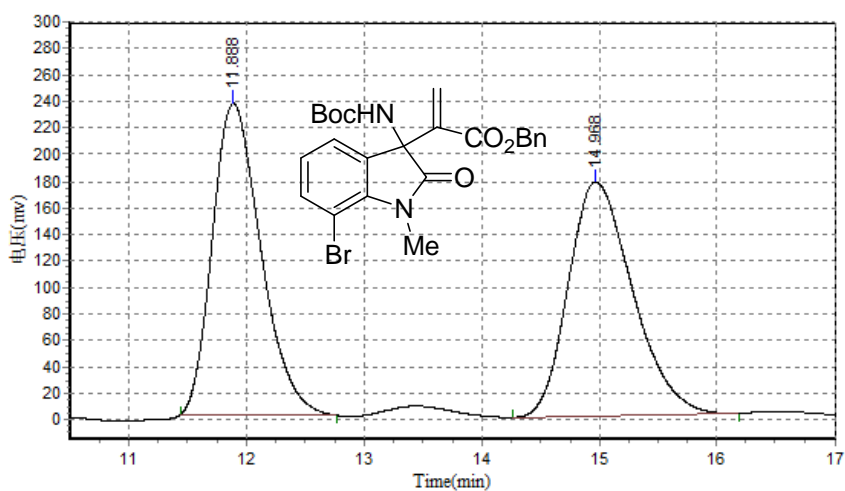

### Results

| Peak No.     | Peak ID | Ret Time | Height     | Area         | Conc.    |
|--------------|---------|----------|------------|--------------|----------|
| 1            |         | 11.888   | 234842.094 | 6751176.500  | 50.0868  |
| 2            |         | 14.968   | 177068.109 | 6727765.500  | 49.9132  |
| <b>Total</b> |         |          | 411910.203 | 13478942.000 | 100.0000 |

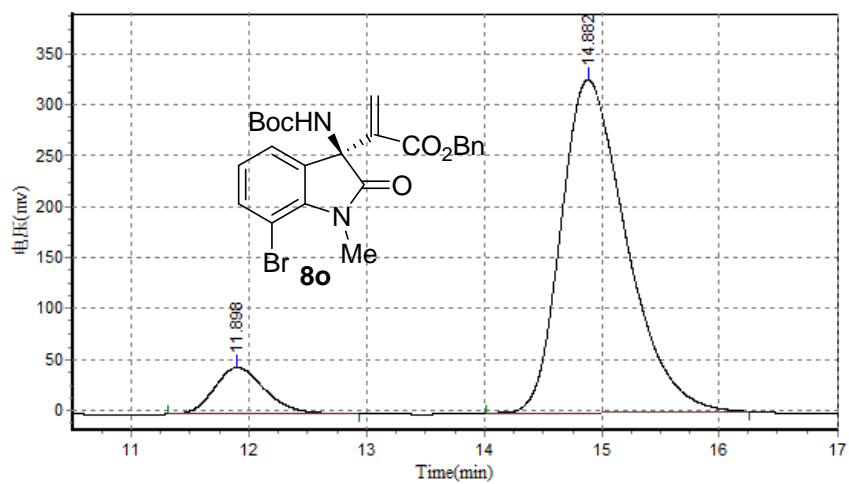

### Results

| Peak No.     | Peak ID | Ret Time | Height     | Area         | Conc.    |
|--------------|---------|----------|------------|--------------|----------|
| 1            |         | 11.898   | 45806.816  | 1382501.750  | 9.8567   |
| 2            |         | 14.882   | 326203.219 | 12643548.000 | 90.1433  |
| <b>Total</b> |         |          | 372010.035 | 14026049.750 | 100.0000 |



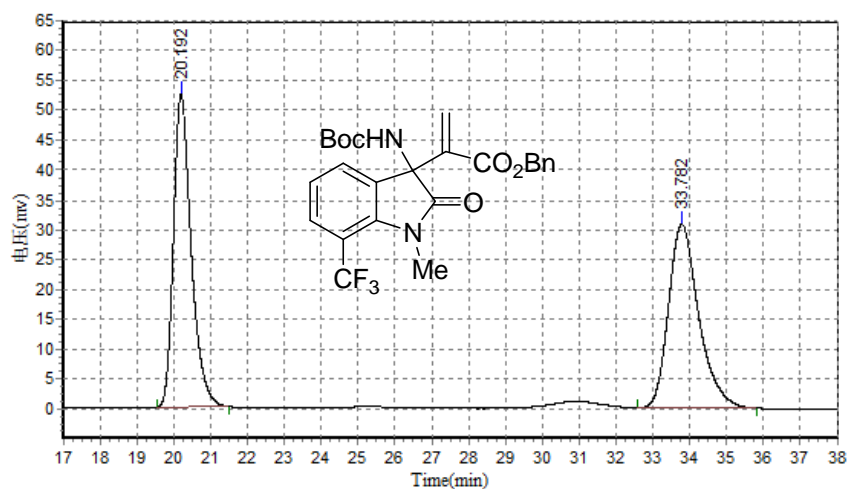

### Results

| Peak No.     | Peak ID | Ret Time | Height    | Area        | Conc.    |
|--------------|---------|----------|-----------|-------------|----------|
| 1            |         | 20.192   | 52420.137 | 1762778.875 | 49.9432  |
| 2            |         | 33.782   | 30903.168 | 1766787.750 | 50.0568  |
| <b>Total</b> |         |          | 83323.305 | 3529566.625 | 100.0000 |

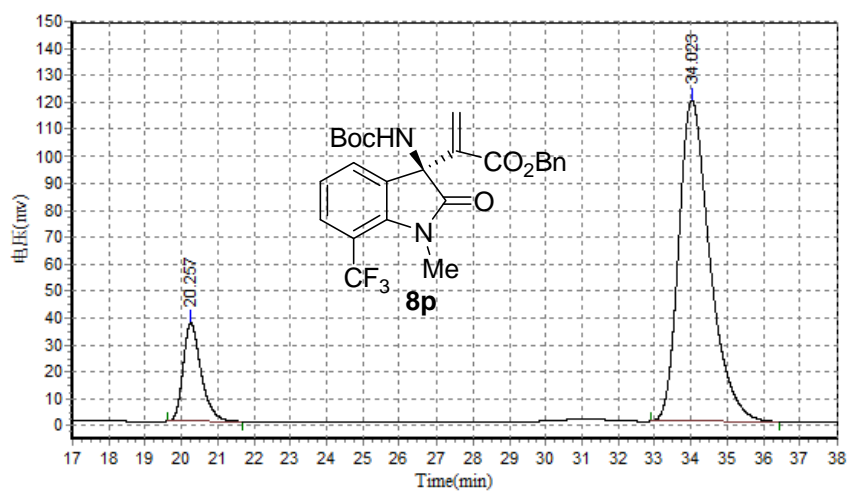

### Results

| Peak No.     | Peak ID | Ret Time | Height     | Area        | Conc.    |
|--------------|---------|----------|------------|-------------|----------|
| 1            |         | 20.257   | 36799.945  | 1262841.125 | 15.0880  |
| 2            |         | 34.023   | 119315.617 | 7106994.500 | 84.9120  |
| <b>Total</b> |         |          | 156115.563 | 8369835.625 | 100.0000 |

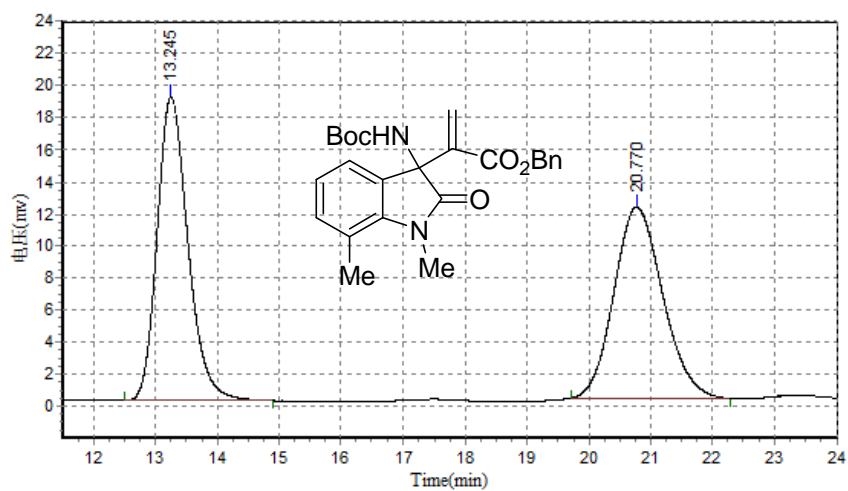

### Results

| Peak No.     | Peak ID | Ret Time | Height    | Area        | Conc.    |
|--------------|---------|----------|-----------|-------------|----------|
| 1            |         | 13.245   | 18919.789 | 656986.750  | 50.0079  |
| 2            |         | 20.770   | 11935.828 | 656780.188  | 49.9921  |
| <b>Total</b> |         |          | 30855.617 | 1313766.938 | 100.0000 |

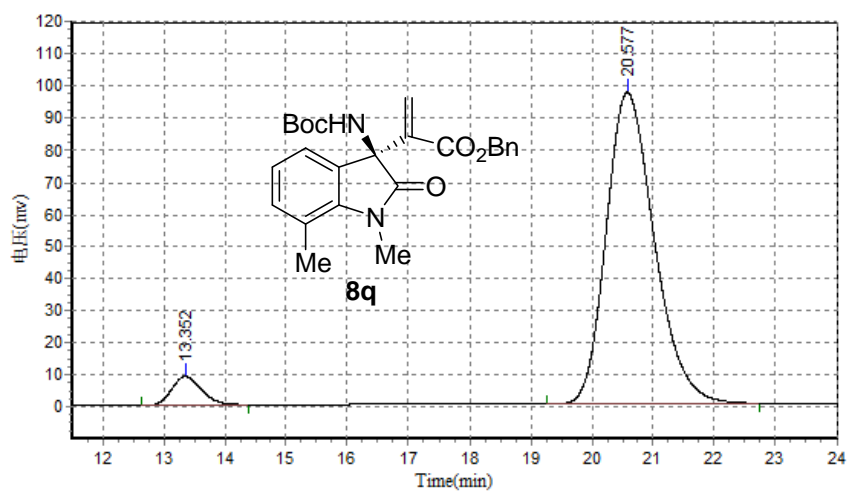

### Results

| Peak No.     | Peak ID | Ret Time | Height     | Area        | Conc.    |
|--------------|---------|----------|------------|-------------|----------|
| 1            |         | 13.352   | 9033.867   | 307131.500  | 5.4556   |
| 2            |         | 20.577   | 96870.289  | 5322508.000 | 94.5444  |
| <b>Total</b> |         |          | 105904.156 | 5629639.500 | 100.0000 |

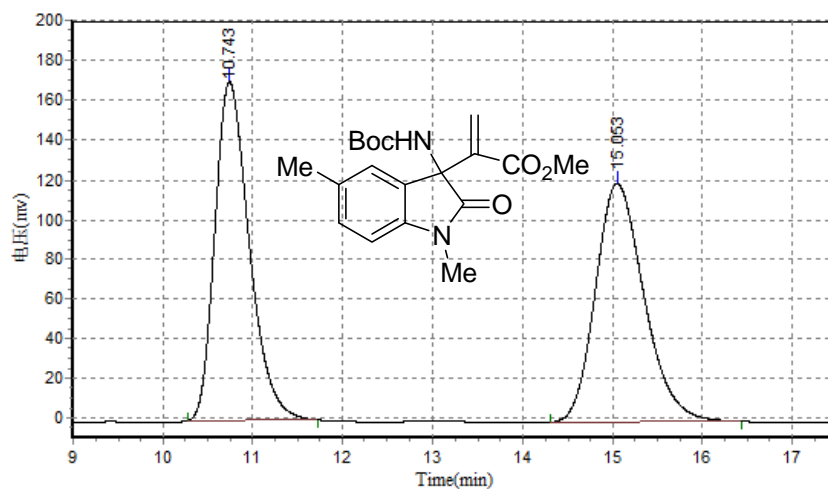

### Results

| Peak No.     | Peak ID | Ret Time | Height     | Area        | Conc.    |
|--------------|---------|----------|------------|-------------|----------|
| 1            |         | 10.743   | 170222.281 | 4546736.500 | 50.0388  |
| 2            |         | 15.053   | 120556.211 | 4539693.500 | 49.9612  |
| <b>Total</b> |         |          | 290778.492 | 9086430.000 | 100.0000 |

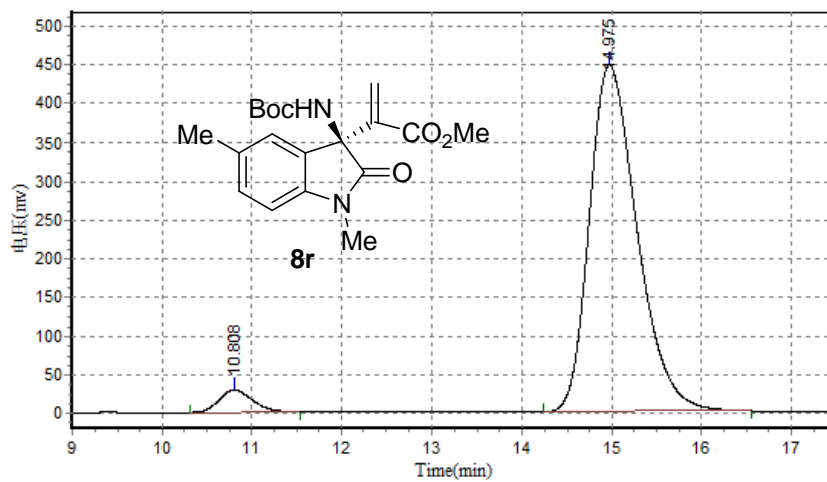

### Results

| Peak No.     | Peak ID | Ret Time | Height     | Area         | Conc.    |
|--------------|---------|----------|------------|--------------|----------|
| 1            |         | 10.808   | 28815.973  | 757933.063   | 4.3670   |
| 2            |         | 14.975   | 448139.344 | 16597805.000 | 95.6330  |
| <b>Total</b> |         |          | 476955.316 | 17355738.063 | 100.0000 |

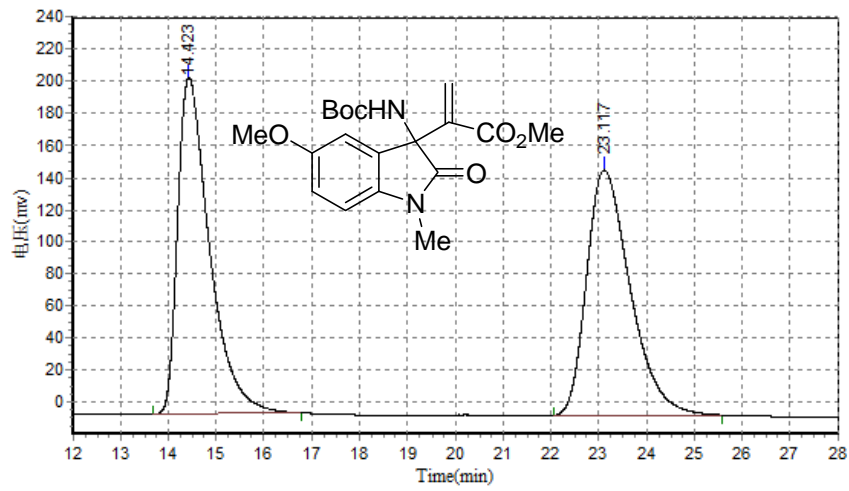

### Results

| Peak No.     | Peak ID | Ret Time | Height     | Area         | Conc.    |
|--------------|---------|----------|------------|--------------|----------|
| 1            |         | 14.423   | 209580.984 | 9749123.000  | 50.0161  |
| 2            |         | 23.117   | 153295.516 | 9742855.000  | 49.9839  |
| <b>Total</b> |         |          | 362876.500 | 19491978.000 | 100.0000 |

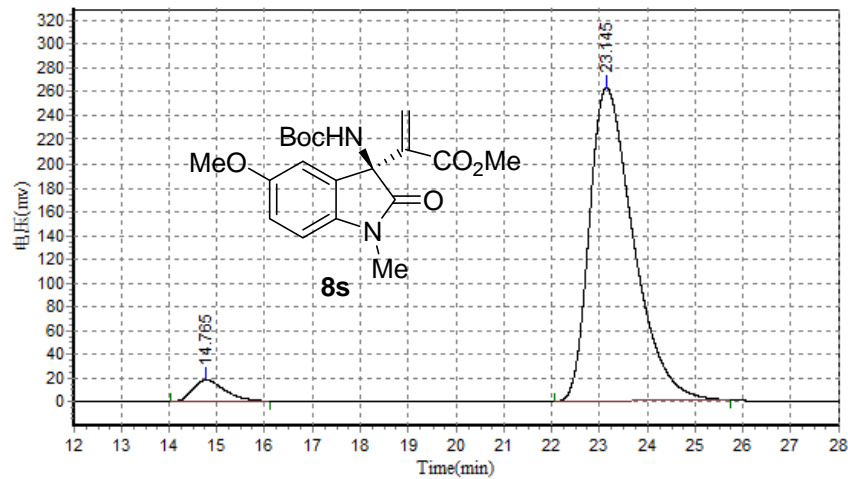

### Results

| Peak No.     | Peak ID | Ret Time | Height     | Area         | Conc.    |
|--------------|---------|----------|------------|--------------|----------|
| 1            |         | 14.765   | 18296.209  | 858213.813   | 4.8310   |
| 2            |         | 23.145   | 262781.875 | 16906578.000 | 95.1690  |
| <b>Total</b> |         |          | 281078.084 | 17764791.813 | 100.0000 |
